# Supplementary material for: Interactions of Dietary Whole-Grain Intake With Fasting Glucose– and Insulin-Related Genetic Loci in Individuals of European Descent: A meta-analysis of 14 cohort studies
Source: PubMed Central journal article supplement — Diabetes Care. 2010 Aug 6;33(12):2684–91. doi: 10.2337/dc10-1150 (PMC2992213; doi:10.2337/dc10-1150), 2010-08-06
Supplement: supp_dc10-1150_dc101150onlineappendix.pdf [file supp_dc10-1150_dc101150onlineappendix.pdf]

# SUPPLEMENT: Interactions of dietary whole grain intake with fasting glucose- and insulin-related genetic loci in individuals of European descent: a meta-analysis of 14 cohort studies

## Author Affiliations:

Jennifer A. Nettleton<sup>1\*</sup>, Nicola M. McKeown<sup>2</sup>, Stavroula Kanoni<sup>3</sup>, Rozenn N. Lemaitre<sup>4</sup>, Marie-France Hivert<sup>5</sup>, Julius Ngwa<sup>6</sup>, Frank J.A. van Rooij<sup>7</sup>, Emily Sonestedt<sup>8</sup>, Mary K. Wojczynski<sup>9</sup>, Zheng Ye<sup>10</sup>, Toshiko Tanaka<sup>11</sup>, Melissa Garcia<sup>12</sup>, Jennifer S. Anderson<sup>13</sup>, Jack L. Follis<sup>14</sup>, Luc Djousse<sup>15</sup>, Kenneth Mukamal<sup>16</sup>, Constantina Papoutsakis<sup>3</sup>, Dariush Mozaffarian<sup>17</sup>, M. Carola Zillikens<sup>18</sup>, Stefania Bandinelli<sup>19</sup>, Amanda J. Bennett<sup>20</sup>, Ingrid B. Borecki<sup>9</sup>, Mary F. Feitosa<sup>9</sup>, Luigi Ferrucci<sup>11</sup>, Nita G. Forouhi<sup>10</sup>, Christopher J. Groves<sup>21</sup>, Goran Hallmans<sup>22</sup>, Tamara Harris<sup>12</sup>, Albert Hofman<sup>7</sup>, Denise K. Houston<sup>13</sup>, Frank B. Hu<sup>23</sup>, Ingegerd Johansson<sup>24</sup>, Stephen B. Kritchevsky<sup>13</sup>, Claudia Langenberg<sup>10</sup>, Lenore Launer<sup>12</sup>, Yongmei Liu<sup>13</sup>, Ruth J. Loos<sup>10</sup>, Michael Nalls<sup>25</sup>, Marju Orho-Melander<sup>8</sup>, Frida Renstrom<sup>26</sup>, Kenneth Rice<sup>4</sup>, Ulf Riserus<sup>27</sup>, Olov Rolandsson<sup>28</sup>, Jerome I. Rotter<sup>29</sup>, Georgia Saylor<sup>13</sup>, Eric J.G. Sijbrands<sup>30</sup>, Per Sjogren<sup>26</sup>, Albert Smith<sup>31</sup>, Laufey Steingrimsdottir<sup>32</sup>, André G. Uitterlinden<sup>18</sup>, Nicholas J. Wareham<sup>10</sup>, Inga Prokopenko<sup>20</sup>, James S. Pankow<sup>33</sup>, Cornelia M. van Duijn<sup>7</sup>, Jose C Florez<sup>34</sup>, Jacqueline C.M. Witteman<sup>7</sup>, the MAGIC Investigators†, Josée Dupuis<sup>35</sup>, George V. Dedoussis<sup>3</sup>, Jose M. Ordovas<sup>36</sup>, Erik Ingelsson<sup>37</sup>, L. Adrienne Cupples<sup>6</sup>, David S. Siscovick<sup>4</sup>, Paul W. Franks<sup>8,38</sup>, James B. Meigs<sup>39</sup>

<sup>1</sup>Division of Epidemiology, Human Genetics, & Environmental Sciences, The University of Texas Health Sciences Center- Houston, Houston, TX, U.S.A.

<sup>2</sup>Nutrition Epidemiology Department, Jean Mayer USDA Human Nutrition Research Center on Aging, Tufts University, Boston, MA, U.S.A.

<sup>3</sup>Department of Nutrition and Dietetics, Harokopio University, Athens, Greece

<sup>4</sup>Cardiovascular Health Research Unit, Department of Medicine, University of Washington, Seattle, WA, U.S.A.

<sup>5</sup>Department of Medicine, Universite de Sherbrooke, Quebec, Canada

<sup>6</sup>Department of Biostatistics, Boston University School of Public Health, Boston University, Boston, MA, U.S.A.

<sup>7</sup>Department of Epidemiology, Erasmus Medical Center Rotterdam, the Netherlands; The Netherlands Genomics Initiative–sponsored Netherlands Consortium for Healthy Aging (NGI-NCHA), Leiden, The Netherlands

<sup>8</sup>Department of Clinical Sciences, Lund University, Malmö, Sweden

<sup>9</sup>Division of Statistical Genomics, Washington University School of Medicine, St. Louis, MO, U.S.A.

<sup>10</sup>MRC Epidemiology Unit, Institute of Metabolic Science, Addenbrooke's Hospital, Cambridge, U.K.

<sup>11</sup>Clinical Research Branch, National Institute on Aging, Baltimore, MD, U.S.A.

<sup>12</sup>Laboratory of Epidemiology, Demography, and Biometry, NIA, Bethesda, MD, U.S.A.

<sup>13</sup>Sticht Center on Aging, Wake Forest University, Winston-Salem, NC, U.S.A.

<sup>14</sup>Division of Biostatistics, The University of Texas Health Sciences Center- Houston, Houston, TX, U.S.A.

<sup>15</sup>Department of Medicine, Brigham and Women's Hospital and Harvard Medical School, Boston, MA; Massachusetts Veterans Epidemiology and Research Information Center and Geriatric Research, Education, and Clinical Center, Boston Veterans Affairs Healthcare System, Boston, MA, U.S.A.

<sup>16</sup>Division of General Medicine & Primary Care; Beth Israel Deaconess Medical Center; Boston, MA, U.S.A.

<sup>17</sup>Division of Cardiovascular Medicine, Brigham and Women's Hospital and Harvard Medical School; Department of Epidemiology, Harvard School of Public Health

<sup>18</sup>Department of Internal Medicine, Erasmus MC, Rotterdam, 3015GE, The Netherlands; Netherlands Genomics Initiative (NGI)-sponsored Netherlands Consortium for Healthy Aging (NCHA)

<sup>19</sup>Geriatric Unit, Azienda Sanitaria Firenze (ASF), Florence, Italy

<sup>20</sup>Oxford Centre for Diabetes, Endocrinology and Metabolism, Churchill Hospital, Oxford, U.K

<sup>21</sup>Wellcome Trust Centre for Human Genetics, University of Oxford, Oxford, U.K; Oxford Centre for Diabetes, Endocrinology and Metabolism, University of Oxford, Oxford, U.K.

<sup>22</sup>Department of Public Health and Clinical Medicine, Nutritional Research, Umeå University, Umeå, Sweden

<sup>23</sup>Channing Laboratory, Department of Medicine, Brigham and Women's Hospital/Harvard Medical School, Boston, MA, U.S.A.

<sup>24</sup>Department of Odontology, Umeå University, Umeå, Sweden

<sup>25</sup>Laboratory of Neurogenetics, National Institute on Aging, Bethesda, MD 20892, USA

<sup>26</sup>Genetic Epidemiology & Clinical Research Group, Department of Public Health & Clinical Medicine, Section for Medicine, Umeå University Hospital, Umeå, Sweden

<sup>27</sup>Department of Public Health and Caring Sciences, Clinical Nutrition and Metabolism, Uppsala University, Uppsala, Sweden

<sup>28</sup>Department of Public Health and Clinical Medicine, Family Medicine, Umeå University, Umeå, Sweden

<sup>29</sup>Division of Medical Genetics, Cedars-Sinai Medical Center, Los Angeles, CA, U.S.A.

<sup>30</sup>Department of Internal Medicine, Erasmus Medical Center Rotterdam, the Netherlands; The Netherlands Genomics Initiative–sponsored Netherlands Consortium for Healthy Aging (NGI-NCHA), Leiden, The Netherlands

<sup>31</sup>Icelandic Heart Association, Kopovagur, Iceland

<sup>32</sup>Icelandic Heart Association, Kopavogur, Iceland, and the Unit for Nutrition Research, Landspítali University Hospital and Faculty for Food Science and Nutrition, University of Iceland

<sup>33</sup>Department of Epidemiology, University of Minnesota, Minneapolis, MN, U.S.A.

<sup>34</sup>Center for Human Genetic Research, Massachusetts General Hospital, Boston, MA, USA.; Program in Medical and Population Genetics, Broad Institute, Cambridge, MA, U.S.A.; Harvard Medical School, Boston, MA, U.S.A.

<sup>35</sup>Department of Biostatistics, Boston University School of Public Health, Boston University, Boston, MA, U.S.A.; National Heart, Lung, and Blood Institute's Framingham Heart Study, Framingham, MA, USA

<sup>36</sup>Nutrition and Genomics Laboratory, Jean Mayer USDA Human Nutrition Research Center on Aging, Tufts University, Boston, MA, U.S.A.

<sup>37</sup>Department of Medical Epidemiology and Biostatistics, Karolinska Institute, Stockholm, Sweden

<sup>38</sup>Genetic Epidemiology & Clinical Research Group, Department of Public Health & Clinical Medicine, Section for Medicine, Umeå University Hospital, Umeå, Sweden; Department of Clinical Sciences, Lund University, Malmö, Sweden

<sup>39</sup>General Medicine Division, Clinical Epidemiology Unit, and Diabetes Research Unit, Massachusetts General Hospital, Boston, MA, U.S.A.

\*Address correspondence to Dr. Jennifer Nettleton  
Assistant Professor, Division of Epidemiology, Human Genetics, & Environmental Sciences  
The University of Texas School of Public Health  
1200 Herman Pressler, suite E-641  
Houston, TX 77030  
U.S.A.

† **MAGIC (Meta-Analyses of Glucose and Insulin-related traits Consortium) Investigators and Institutions:**

©2010 American Diabetes Association. Published online at <http://care.diabetesjournals.org/cgi/content/full/dc10-1150/DC1>

Josée Dupuis<sup>1,2</sup>, Claudia Langenberg<sup>3</sup>, Inga Prokopenko<sup>4,5</sup>, Richa Saxena<sup>6,7</sup>, Nicole Soranzo<sup>8,9</sup>, Anne U Jackson<sup>10</sup>, Eleanor Wheeler<sup>11</sup>, Nicole L Glazer<sup>12</sup>, Nabila Bouatia-Naji<sup>13</sup>, Cecilia M Lindgren<sup>4,5</sup>, Reedik Mägi<sup>4,5</sup>, Andrew P Morris<sup>5</sup>, Joshua Randall<sup>5</sup>, Denis Rybin<sup>14</sup>, Toby Johnson<sup>15-17</sup>, Peter Henneman<sup>18</sup>, Christian Gieger<sup>19</sup>, Gudmar Thorleifsson<sup>20</sup>, Valgerdur Steinthorsdottir<sup>20</sup>, Abbas Dehghan<sup>21</sup>, Jouke Jan Hottenga<sup>22</sup>, Christopher S Franklin<sup>23</sup>, Pau Navarro<sup>24</sup>, Kijoung Song<sup>25</sup>, Anuj Goel<sup>5,26</sup>, John R B Perry<sup>27</sup>, Taina Lajunen<sup>28</sup>, Harald Grollert<sup>19</sup>, Man Li<sup>29</sup>, Heather M Stringham<sup>10</sup>, Meena Kumari<sup>30</sup>, Nicholas J Timpson<sup>31</sup>, Peter Shrader<sup>32</sup>, Erik Ingelsson<sup>33,34</sup>, Carina Zabena<sup>35</sup>, Jeffrey O'Connell<sup>36</sup>, Christine Cavalcanti-Proença<sup>13</sup>, Jian'an Luan<sup>3</sup>, Amanda Elliott<sup>6,7</sup>, Steven A McCarroll<sup>6,7</sup>, Felicity Payne<sup>11</sup>, Rosa Maria Ruccasecca<sup>11</sup>, Praveen Sethupathy<sup>37</sup>, Toby Andrew<sup>9</sup>, Yavuz Ariyurek<sup>38</sup>, Beverley Balkau<sup>39</sup>, Philip Barter<sup>40</sup>, Amanda J Bennett<sup>4</sup>, Yoav Ben-Shlomo<sup>41</sup>, Sven Bergmann<sup>15,16</sup>, Murielle Bochud<sup>16</sup>, Eric Boerwinkle<sup>42</sup>, Amélie Bonnefond<sup>13</sup>, Lori L Bonnycastle<sup>37</sup>, Yvonne Böttcher<sup>43</sup>, Eric Brunner<sup>30</sup>, Suzannah J Bumpstead<sup>8</sup>, Yii-Der Ida Chen<sup>44</sup>, Peter Chines<sup>37</sup>, Robert Clarke<sup>45</sup>, Lachlan J M Coin<sup>46</sup>, Gabriel J Crawford<sup>6</sup>, Laura Crisponi<sup>47</sup>, Ian N M Day<sup>31</sup>, Eco de Geus<sup>22</sup>, Christian Dina<sup>13</sup>, Alex Doney<sup>48</sup>, Josephine M Egan<sup>49</sup>, Paul Elliott<sup>46</sup>, Michael R Erdos<sup>37</sup>, Antje Fischer-Rosinsky<sup>50,51</sup>, Nita G Forouhi<sup>3</sup>, Caroline S Fox<sup>2,52</sup>, Rune Frants<sup>18</sup>, Maria Grazia Franzosi<sup>53</sup>, Pilar Galan<sup>54</sup>, Mark O Goodarzi<sup>44</sup>, Jürgen Graessler<sup>55</sup>, Christopher J Groves<sup>4</sup>, Scott Grundy<sup>56</sup>, Rhian Gwilliam<sup>8</sup>, Göran Hallmans<sup>57</sup>, Naomi Hammond<sup>8</sup>, Xijing Han<sup>10</sup>, Anna-Liisa Hartikainen<sup>58</sup>, Caroline Hayward<sup>24</sup>, Simon C Heath<sup>59</sup>, Serge Hercberg<sup>60</sup>, Christian Herder<sup>61</sup>, Andrew Anthony Hicks<sup>62</sup>, Aroon D Hingorani<sup>30</sup>, Albert Hofman<sup>21</sup>, Bo Isomaa<sup>63</sup>, Antti Jula<sup>64</sup>, Marika Kaakinen<sup>65</sup>, Stavroula Kanoni<sup>66</sup>, Y Antero Kesaniemi<sup>67</sup>, Mika Kivimaki<sup>30</sup>, Beatrice Knight<sup>68</sup>, Seppo Koskinen<sup>69</sup>, Peter Kovacs<sup>70</sup>, G Mark Lathrop<sup>59</sup>, Debbie A Lawlor<sup>31</sup>, Yun Li<sup>10</sup>, Valeriya Lyssenko<sup>71</sup>, Robert Mahley<sup>72</sup>, Massimo Mangino<sup>9</sup>, Alisa K Manning<sup>1</sup>, María Teresa Martínez-Larrad<sup>35</sup>, Jarred B McAteer<sup>6,73,74</sup>, Ruth McPherson<sup>75</sup>, Christa Meisinger<sup>19</sup>, David Melzer<sup>27</sup>, David Meyre<sup>13</sup>, Braxton D Mitchell<sup>36</sup>, Mario A Morken<sup>37</sup>, Silvia Naitz<sup>47</sup>, Narisu Narisu<sup>37</sup>, Matthew J Neville<sup>4,76</sup>, Ben A Oostra<sup>77</sup>, Marco Orrù<sup>47</sup>, Ruth Pakyz<sup>36</sup>, Colin N A Palmer<sup>78</sup>, Giuseppe Paolisso<sup>79</sup>, Cristian Pattaro<sup>62</sup>, Daniel Pearson<sup>37</sup>, John F Peden<sup>5,26</sup>, Markus Perola<sup>80-82</sup>, Andreas F H Pfeiffer<sup>50,51</sup>, Irene Pichler<sup>62</sup>, Ozren Polasek<sup>83</sup>, Danielle Posthuma<sup>22,84</sup>, Simon C Potter<sup>8</sup>, Anneli Pouta<sup>85</sup>, Bruce M Psaty<sup>86,87</sup>, Wolfgang Rathmann<sup>88</sup>, Nigel W Rayner<sup>4,5</sup>, Kenneth Rice<sup>89</sup>, Samuli Ripatti<sup>80,81</sup>, Fernando Rivadeneira<sup>21,90</sup>, Olov Rolandsson<sup>91</sup>, Manjinder Sandhu<sup>3,92</sup>, Serena Sanna<sup>47</sup>, Avan Aihie Sayer<sup>93</sup>, Paul Scheet<sup>94</sup>, Laura J Scott<sup>10</sup>, Udo Seedorf<sup>95</sup>, Stephen J Sharp<sup>3</sup>, Beverley Shields<sup>68</sup>, Erik J G Sijbrands<sup>21,90</sup>, Angela Silveira<sup>96</sup>, Andrew Singleton<sup>97</sup>, Nicholas L Smith<sup>98</sup>, Ulla Sovio<sup>46</sup>, Amy Swift<sup>37</sup>, Holly Syddall<sup>93</sup>, Ann-Christine Syvänen<sup>100</sup>, Toshiko Tanaka<sup>101,102</sup>, Anke Tönjes<sup>43,103</sup>, Tiinamaija Tuomi<sup>63,104</sup>, André G Uitterlinden<sup>21,90</sup>, Ko Willems van Dijk<sup>18,105</sup>, Dhiraj Varma<sup>8</sup>, Sophie Visvikis-Siest<sup>106</sup>, Veronique Vitart<sup>24</sup>, Nicole Vogelzangs<sup>107</sup>, Gérard Waeber<sup>108</sup>, Peter J Wagner<sup>80,81</sup>, Hugh Watkins<sup>5,26</sup>, Michael N Weedon<sup>27</sup>, Sarah H Wild<sup>23</sup>, Gonneke Willemssen<sup>22</sup>, Jaqueline C M Witteman<sup>21</sup>, John W G Yarnell<sup>109</sup>, Diana Zelenika<sup>59</sup>, Björn Zethelius<sup>34,110</sup>, Guangju Zhai<sup>9</sup>, Jing Hua Zhao<sup>3</sup>, M Carola Zillikens<sup>90</sup>, GIANT Consortium<sup>111</sup>, Global BPgen Consortium<sup>111</sup>, Ruth J F Loos<sup>3</sup>, Pierre Meneton<sup>60</sup>, David M Nathan<sup>73,74</sup>, Gordon H Williams<sup>52,74</sup>, Andrew T Hattersley<sup>68</sup>, Kaisa Silander<sup>80,81</sup>, Veikko Salomaa<sup>112</sup>, George Davey Smith<sup>31</sup>, Stefan R Bornstein<sup>55</sup>, Peter Schwarz<sup>55</sup>, Joachim Spranger<sup>50,51</sup>, Fredrik Karpe<sup>4,76</sup>, Alan R Shuldiner<sup>36</sup>, Cyrus Cooper<sup>93</sup>, George V Dedoussis<sup>66</sup>, Manuel Serrano-Ríos<sup>35</sup>, Andrew D Morris<sup>78</sup>, Lars Lind<sup>100</sup>, Paul W Franks<sup>113</sup>, Shah Ebrahim<sup>114</sup>, Michael Marmot<sup>30</sup>, Johanna Kuusisto<sup>115</sup>, Markku Laakso<sup>115</sup>, W H Linda Kao<sup>29,116,117</sup>, James S Pankow<sup>118</sup>, Peter Paul Pramstaller<sup>62,119,120</sup>, H Erich Wichmann<sup>19,121</sup>, Thomas Illig<sup>19</sup>, Igor Rudan<sup>122,123</sup>, Alan Wright<sup>24</sup>, Michael Stumvoll<sup>43</sup>, Harry Campbell<sup>23</sup>, James F Wilson<sup>23</sup>, Anders Hamsten on behalf of the PROCARDIS Consortium<sup>96</sup>, Richard N Bergman<sup>124</sup>, Thomas A Buchanan<sup>124,125</sup>, Francis S Collins<sup>37</sup>, Karen L Mohlke<sup>126</sup>, Jaakko Tuomilehto<sup>104,127</sup>, Timo T Valle<sup>127</sup>, David Altshuler<sup>6,7,73,74</sup>, Jerome I Rotter<sup>44</sup>, David S Siscovick<sup>128</sup>, Brenda W J H Penninx<sup>107</sup>, Dorret Boomsma<sup>22</sup>, Panos Deloukas<sup>8</sup>, Timothy D Spector<sup>8,9</sup>, Timothy M Frayling<sup>27</sup>, Luigi Ferrucci<sup>29</sup>, Augustine Kong<sup>20</sup>, Unnur Thorsteinsdottir<sup>20,130</sup>, Kari Stefansson<sup>20,130</sup>, Cornelia M van Duijn<sup>21</sup>, Yurii S Aulchenko<sup>21</sup>, Antonio Cao<sup>47</sup>, Angelo Scuteri<sup>31</sup>, David Schlessinger<sup>37</sup>, Manuela Uda<sup>47</sup>, Aimo Ruokonen<sup>58</sup>, Marjo-Riitta Jarvelin<sup>65</sup>, Dawn M Waterworth<sup>25</sup>, Peter Vollenweider<sup>108</sup>, Leena Peltonen<sup>8,80-82,132</sup>, Vincent Mooser<sup>25</sup>, Goncalo R Abecasis<sup>10</sup>, Nicholas J Wareham<sup>3</sup>, Robert Sladek<sup>133,134</sup>, Philippe Frogue<sup>113,135</sup>, Richard M Watanabe<sup>124,136</sup>, James B Meigs<sup>32,74</sup>, Leif Groop<sup>71</sup>, Michael Boehnke<sup>10</sup>, Mark I McCarthy<sup>4,5,76</sup>, Jose C Florez<sup>6,7,73,74</sup> and Inês Barroso<sup>11</sup>

1. Department of Biostatistics, Boston University School of Public Health, Boston, Massachusetts 02118, USA.
2. National Heart, Lung, and Blood Institute's Framingham Heart Study, Framingham, Massachusetts 01702, USA.
3. MRC Epidemiology Unit, Institute of Metabolic Science, Addenbrooke's Hospital, Cambridge CB2 0QQ, UK.
4. Oxford Centre for Diabetes, Endocrinology and Metabolism, University of Oxford, Oxford OX3 7LJ, UK.
5. Wellcome Trust Centre for Human Genetics, University of Oxford, Oxford OX3 7BN, UK.
6. Program in Medical and Population Genetics, Broad Institute, Cambridge, Massachusetts 02142, USA.
7. Center for Human Genetic Research, Massachusetts General Hospital, Boston, Massachusetts 02114, USA.
8. Wellcome Trust Sanger Institute, Hinxton, Cambridge CB10 1SA, UK.
9. Twin Research & Genetic Epidemiology Department, King's College London, St Thomas' Hospital Campus, Lambeth Palace Rd, London SE1 7EH, UK.
10. Center for Statistical Genetics, Department of Biostatistics, University of Michigan School of Public Health, Ann Arbor, Michigan 48109, USA.
11. Metabolic Disease Group, Wellcome Trust Sanger Institute, Hinxton, Cambridge CB10 1SA, UK.
12. Cardiovascular Health Research Unit and Department of Medicine, University of Washington, Seattle, Washington, USA.
13. CNRS-UMR8090, Pasteur Institute, Lille 2-Droit et Santé University, F-59000 Lille, France.
14. Boston University Data Coordinating Center, Boston, Massachusetts 02118, USA.
15. Department of Medical Genetics, University of Lausanne, 1005 Lausanne, Switzerland.

16. University Institute of Social and Preventative Medicine, Centre Hospitalier Universitaire Vaudois (CHUV) and University of Lausanne, 1005 Lausanne, Switzerland.
17. Swiss Institute of Bioinformatics, Switzerland.
18. Department of Human Genetics, Leiden University Medical Centre, 2300 RC Leiden, The Netherlands.
19. Institute of Epidemiology, Helmholtz Zentrum Muenchen, Neuherberg, Germany.
20. deCODE Genetics, 101 Reykjavik, Iceland.
21. Department of Epidemiology, Erasmus Medical Center Rotterdam, 3000 CA, The Netherlands.
22. Department of Biological Psychology, VU, Van der Boechorststraat 1, 1081 BT Amsterdam, Netherlands.
23. Centre for Population Health Sciences, University of Edinburgh, Edinburgh EH8 9AG, UK.
24. MRC Human Genetics Unit, IGMM, Edinburgh EH4 2XU, UK.
25. Medical Genetics/Clinical Pharmacology and Discovery Medicine, Glaxo SmithKline, King of Prussia, Pennsylvania 19406, USA.
26. Department of Cardiovascular Medicine, University of Oxford, Oxford OX3 9DU, UK.
27. Genetics of Complex Traits, Institute of Biomedical and Clinical Sciences, Peninsula College of Medicine and Dentistry, University of Exeter, UK.
28. Unit for Child and Adolescent Health and Welfare, National Institute for Health and Welfare, Biocenter Oulu, University of Oulu, 90014 Oulu, Finland.
29. Department of Epidemiology, School of Medicine and Bloomberg School of Public Health, Johns Hopkins University, Baltimore, Maryland 21287, USA.
30. Department of Epidemiology and Public Health, University College London, UK.
31. MRC Centre for Causal Analyses in Translational Epidemiology, University of Bristol, Bristol BS8 2PR, UK.
32. General Medicine Division, Massachusetts General Hospital, Boston, Massachusetts, USA.
33. Department of Medical Epidemiology and Biostatistics, Karolinska Institutet, Stockholm, Sweden.
34. Department of Public Health and Caring Sciences, Uppsala University, Uppsala, Sweden.
35. Fundación para la Investigación Biomédica del Hospital Clínico San Carlos, Madrid, Spain.
36. Division of Endocrinology, Diabetes and Nutrition, University of Maryland School of Medicine, Baltimore, Maryland 21201, USA.
37. Genome Technology Branch, National Human Genome Research Institute, Bethesda, Maryland 20892, USA.
38. Leiden Genome Technology Center, Leiden University Medical Center, 2300 RC Leiden, The Netherlands.
39. INSERM U780-IFR69, Paris Sud University, F-94807 Villejuif, France.
40. The Heart Research Institute, Sydney, New South Wales, Australia.
41. Department of Social Medicine, University of Bristol, Bristol BS8 2PR, UK.
42. The Human Genetics Center and Institute of Molecular Medicine, University of Texas Health Science Center, Houston, Texas 77030, USA.
43. Department of Medicine, University of Leipzig, Liebigstr. 18, 04103 Leipzig, Germany.
44. Medical Genetics Institute, Cedars-Sinai Medical Center, Los Angeles, California, USA.
45. Clinical Trial Service Unit and Epidemiological Studies Unit, University of Oxford, Oxford OX3 7LF, UK.
46. Department of Epidemiology and Public Health, Imperial College of London, Norfolk Place, London W2 1PG, UK.
47. Istituto di Neurogenetica e Neurofarmacologia (INN), Consiglio Nazionale delle Ricerche, c/o Cittadella Universitaria di Monserrato, Monserrato, Cagliari 09042, Italy.
48. Department of Medicine & Therapeutics, Level 7, Ninewells Hospital & Medical School, Dundee DD1 9SY, UK.
49. Laboratory of Clinical Investigation, National Institute of Aging, Baltimore, Maryland 21250, USA.
50. Department of Endocrinology, Diabetes and Nutrition, Charite-Universitaetsmedizin Berlin, Berlin, Germany.
51. Department of Clinical Nutrition, German Institute of Human Nutrition Potsdam-Rehbruecke, Nuthetal, Germany.
52. Division of Endocrinology, Diabetes, and Hypertension, Brigham and Women's Hospital, Harvard Medical School, Boston, Massachusetts, USA.
53. Department of Cardiovascular Research, Istituto di Ricerche Farmacologiche 'Mario Negri', Milan, Italy.
54. U557 Institut National de la Santé et de la Recherche Médicale, U1125 Institut National de la Recherche Agronomique, Université Paris 13, 74 rue Marcel Cachin, 93017 Bobigny Cedex, France.
55. Department of Medicine III, Division Prevention and Care of Diabetes, University of Dresden, 01307 Dresden.
56. Center for Human Nutrition, University of Texas Southwestern Medical Center, Dallas, Texas, USA.
57. Department of Public Health & Clinical Medicine, Section for Nutritional Research, Umeå University, Umeå, Sweden.
58. Institute of Clinical Medicine, University of Oulu, Box 5000, Fin-90014 University of Oulu, Finland.
59. Centre National de Génotypage/IG/CEA, 2 rue Gaston Crémieux CP 5721, 91057 Evry Cedex, France.
60. U872 Institut National de la Santé et de la Recherche Médicale, Faculté de Médecine Paris Descartes, 15 rue de l'Ecole de Médecine, 75270 Paris Cedex, France.
61. Institute for Clinical Diabetes Research, German Diabetes Centre, Leibniz Centre at Heinrich Heine University Düsseldorf, Düsseldorf, Germany.
62. Institute of Genetic Medicine, European Academy Bozen/Bolzano (EURAC), Viale Druso 1, 39100 Bolzano, Italy, Affiliated Institute of the University Lübeck, Germany.
63. Folkhalsan Research Centre, Helsinki, Finland.
64. National Institute for Health and Welfare, Unit of Population Studies, Turku, Finland.
65. Institute of Health Sciences and Biocenter Oulu, Box 5000, Fin-90014 University of Oulu, Finland.

66. Department of Nutrition - Dietetics, Harokopio University, 17671 Athens, Greece.
67. Department of Internal Medicine and Biocenter Oulu, Oulu, Finland.
68. Diabetes Genetics, Institute of Biomedical and Clinical Science, Peninsula College of Medicine and Dentistry, University of Exeter, Exeter, UK.
69. National Institute for Health and Welfare, Unit of Living Conditions, Health and Wellbeing, Helsinki, Finland.
70. Interdisciplinary Centre for Clinical Research, University of Leipzig, Inselstr. 22, 04103 Leipzig, Germany.
71. Department of Clinical Sciences, Diabetes and Endocrinology, Lund University, University Hospital Malmo, Malmo, Sweden.
72. Gladstone Institute of Cardiovascular Disease, University of California, San Francisco, California, USA.
73. Diabetes Research Center (Diabetes Unit), Massachusetts General Hospital, Boston, Massachusetts 02114, USA.
74. Department of Medicine, Harvard Medical School, Boston, Massachusetts 02115, USA.
75. Division of Cardiology, University of Ottawa Heart Institute, Ottawa, Ontario, Canada.
76. Oxford NIHR Biomedical Research Centre, Churchill Hospital, Oxford OX3 7LJ, UK.
77. Department of Clinical Genetics, Erasmus Medical Center Rotterdam, 3000 CA, The Netherlands.
78. Biomedical Research Institute, University of Dundee, Ninewells Hospital & Medical School, Dundee DD1 9SY, UK.
79. Department of Geriatric Medicine and Metabolic Disease, Second University of Naples, Naples, Italy.
80. Institute for Molecular Medicine Finland FIMM, University of Helsinki, Helsinki, Finland.
81. National Institute for Health and Welfare, Unit of Public Health Genomics, Helsinki, Finland.
82. Department of Medical Genetics, University of Helsinki, Helsinki, Finland.
83. Department of Medical Statistics, Epidemiology and Medical Informatics, Andrija Stampar School of Public Health, Medical School, University of Zagreb, Rockefellerova 4, 10000 Zagreb, Croatia.
84. Department of Clinical Genetics, VUMC, Van der Boechorststraat 7, 1081 BT Amsterdam, Netherlands.
85. Department of Obstetrics and Gynaecology, Oulu University Hospital, Oulu, Finland.
86. Departments of Medicine, Epidemiology, and Health Services, University of Washington, Seattle, Washington, USA.
87. Group Health Center for Health Studies, Seattle, Washington, USA.
88. Institute of Biometrics and Epidemiology, German Diabetes Centre, Leibniz Centre at Heinrich Heine University Düsseldorf, Düsseldorf, Germany.
89. Department of Biostatistics, University of Washington, Seattle, Washington 98195, USA.
90. Department of Internal Medicine, Erasmus Medical Center Rotterdam, 3000 CA, The Netherlands.
91. Department of Public Health & Clinical Medicine, Section for Family Medicine, Umeå University Hospital, Umeå, Sweden.
92. Department of Public Health and Primary Care, Strangeways Research Laboratory, University of Cambridge, Cambridge, UK.
93. MRC Epidemiology Resource Centre, University of Southampton, Southampton General Hospital, Southampton SO16 6YD, UK.
94. Department of Epidemiology, University of Texas, M.D. Anderson Cancer Center, Houston, Texas, 77030, USA.
95. Leibniz-Institut für Arterioskleroseforschung an der Universität Münster, Münster, Germany.
96. Atherosclerosis Research Unit, Department of Medicine, Karolinska Institutet Stockholm, Sweden.
97. Laboratory of Neurogenetics, National Institute on Aging, Bethesda, Maryland 20892, USA.
98. Department of Epidemiology, University of Washington, Seattle, Washington 98195, USA.
99. Seattle Epidemiologic Research and Information Center, Department of Veterans Affairs Office of Research and Development, Seattle, Washington, USA.
100. Department of Medical Sciences, Uppsala University, Uppsala, Sweden.
101. Medstar Research Institute, Baltimore, Maryland 21250, USA.
102. Clinical Research Branch, National Institute on Aging, Baltimore, Maryland 21250, USA.
103. Coordination Centre for Clinical Trials, University of Leipzig, Härtelstr. 16-18, 04103 Leipzig, Germany.
104. Department of Medicine, Helsinki University Hospital, University of Helsinki, Helsinki, Finland.
105. Department of Internal Medicine, Leiden University Medical Centre, 2300 RC Leiden, The Netherlands.
106. Research Unit, Cardiovascular Genetics, Nancy University Henri Poincaré, Nancy, France.
107. EMGO Institute/Department of Psychiatry, VU University Medical Center, Amsterdam, Netherlands.
108. Department of Internal Medicine, Centre Hospitalier Universitaire Vaudois, 1011 Lausanne, Switzerland.
109. Epidemiology & Public Health, Queen's University Belfast, Belfast BT12 6BJ, UK.
110. Medical Products Agency, Uppsala, Sweden.
111. See reference #32 for full list of authors.
112. National Institute for Health and Welfare, Unit of Chronic Disease Epidemiology and Prevention, Helsinki, Finland.
113. Genetic Epidemiology & Clinical Research Group, Department of Public Health & Clinical Medicine, Section for Medicine, Umeå University Hospital, Umeå, Sweden.
114. London School of Hygiene and Tropical Medicine, London WC1E 7HT, UK.
115. Department of Medicine, University of Kuopio and Kuopio University Hospital, Kuopio 70210, Finland.
116. Department of Medicine, School of Medicine and Bloomberg School of Public Health, Johns Hopkins University, Baltimore, Maryland 21287, USA.
117. The Welch Center for Prevention, Epidemiology, and Clinical Research, School of Medicine and Bloomberg School of Public Health, Johns Hopkins University, Baltimore, Maryland 21287, USA.
118. Division of Epidemiology and Community Health, School of Public Health, University of Minnesota, Minneapolis, Minnesota 55454, USA.

119. Department of Neurology, General Central Hospital, 39100 Bolzano, Italy.
120. Department of Neurology, University of Lübeck, Ratzeburger Allee 160, 23538 Lübeck, Germany.
121. Institute of Medical Informatics, Biometry and Epidemiology, Ludwig-Maximilians-Universität, Munich, Germany.
122. School of Medicine, University of Split, Soltanska 2, 21000 Split, Croatia.
123. Sisters of Mercy University Hospital, Zagreb, Croatia.
124. Department of Physiology and Biophysics, Keck School of Medicine, University of Southern California, Los Angeles, California 90033, USA.
125. Department of Medicine, Division of Endocrinology, Keck School of Medicine, University of Southern California, Los Angeles, California 90033, USA.
126. Department of Genetics, University of North Carolina, Chapel Hill, North Carolina 27599, USA.
127. National Institute for Health and Welfare, Unit of Diabetes Prevention, Helsinki, Finland.
128. Departments of Medicine and Epidemiology, University of Washington, Seattle, Washington, USA.
129. Longitudinal Studies Section, Clinical Research Branch, National Institute on Aging, NIH, Baltimore, Maryland, USA.
130. Faculty of Medicine, University of Iceland, 101 Reykjavík, Iceland.
131. 28 UO Geriatria - Istituto Nazionale Ricovero e Cura per Anziani (INRCA IRCCS) - Rome, Italy.
132. The Broad Institute, Cambridge, Massachusetts 02141, USA.
133. Departments of Medicine and Human Genetics, McGill University, Montreal, Canada.
134. Genome Quebec Innovation Centre, Montreal H3A 1A4, Canada.
135. Genomic Medicine, Imperial College London, Hammersmith Hospital, W12 0NN, London, UK.
136. Department of Preventive Medicine, Keck School of Medicine, University of Southern California, Los Angeles, California, 90033, USA.

## **Acknowledgements:**

The *Health, Aging and Body Composition (Health ABC)* study was supported in part by the Intramural Research Program of the NIH, National Institute on Aging contracts N01AG62101, N01AG62103, and N01AG62106. The genome-wide association study was funded by NIA grant R01 AG032098 to Wake Forest University Health Sciences and genotyping services were provided by the Center for Inherited Disease Research (CIDR). CIDR is fully funded through a federal contract from the National Institutes of Health to The Johns Hopkins University, contract number HHSN268200782096C.

[representing authors: JSA, DKH, SBK, YL, GS]

The *Cardiovascular Health Study (CHS)* research reported in this article was supported by contract numbers N01-HC-85079 through N01-HC-85086, N01-HC-35129, N01 HC-15103, N01 HC-55222, N01-HC-75150, N01-HC-45133, grant numbers U01 HL080295 and R01 HL087652 from the National Heart, Lung, and Blood Institute, with additional contribution from the National Institute of Neurological Disorders and Stroke. A full list of principal CHS investigators and institutions can be found at <http://www.chs-nhlbi.org/pi.htm>. DNA handling and genotyping was supported in part by National Center for Research Resources grant M01RR00069 to the Cedars-Sinai General Clinical Research Center Genotyping core and National Institute of Diabetes and Digestive and Kidney Diseases grant DK063491 to the Southern California Diabetes Endocrinology Research Center.

[representing authors: RNL, LD, KM, DM, KR, JR, DSS]

The *Framingham Offspring Study* and *Framingham Third Generation Study (FHS)* were conducted in part using data and resources from the Framingham Heart Study of the National Heart Lung and Blood Institute of the National Institutes of Health and Boston University School of Medicine. The analyses reflect intellectual input and resource development from the Framingham Heart Study investigators participating in the SNP Health Association Resource (SHARe) project. This work was partially supported by the National Heart, Lung and Blood Institute's Framingham Heart Study (Contract No. N01-HC-25195) and its contract with Affymetrix, Inc for genotyping services (Contract No. N02-HL-6-4278). A portion of this research utilized the Linux Cluster for Genetic Analysis (LinGA-II) funded by the Robert Dawson Evans Endowment of the Department of Medicine at Boston University School of Medicine and Boston Medical Center. Also supported by National Institute for Diabetes and Digestive and Kidney Diseases (NIDDK) R01 DK078616 to Drs. Meigs, Dupuis and Florez, NIDDK K24 DK080140 to Dr. Meigs, and a Massachusetts General Hospital Physician Scientist Development Award and a Doris Duke Charitable Foundation Clinical Scientist Development Award to Dr. Florez. Dr. Hivert was supported by the Centre de Recherche Medicale de l'Universite de Sherbrooke (CRMUS) and a Canadian Institute of Health Research (CHIR) Fellowships Health Professional Award. Dr. Nicola McKeown is supported by the USDA agreement No. 58-1950-7-707.

[representing authors: NM, MFH, JN, AC, JD, JMO, JBM]

The *Atherosclerosis Risk in Communities (ARIC)* study is carried out as a collaborative study supported by National Heart, Lung, and Blood Institute contracts N01-HC-55015, N01-HC-55016, N01-HC-55018, N01-HC-55019, N01-HC-55020, N01-HC-55021, N01-HC-55022, R01HL087641, R01HL59367 and R01HL086694; National Human Genome Research Institute contract U01HG004402; and National Institutes of Health contract HHSN268200625226C. The authors thank the staff and participants of the ARIC study for their important contributions. Infrastructure was partly supported by Grant Number UL1RR025005, a component of the National Institutes of Health and NIH Roadmap for Medical Research. Dr. Nettleton is supported by a K01 from the National Institutes of Health, National Institute of Diabetes and Digestive and Kidney Diseases (5K01DK082729-02).

[representing authors: JAN, JLF, JSP]

The *Family Heart Study (FamHS)* work was supported in part by NIH grants 5R01 HL08770003, 5R01 HL08821502 (Michael A. Province) from NHLBI, and 5R01 DK07568102, 5R01 DK06833603 from NIDDK (Ingrid B. Borecki), and by the National Heart, Lung, and Blood Institute cooperative agreement grants U01 HL 67893, U01 HL67894, U01 HL67895, U01 HL67896, U01 HL67897, U01 HL67898, U01 HL67899, U01 HL67900, U01 HL67901, U01 HL67902, U01 HL56563, U01 HL56564, U01 HL56565, U01 HL56566, U01 HL56567, U01 HL56568, and U01 HL56569. The investigators thank the staff and participants of the FHS for their important contributions.

[representing authors: MKW, LD, MFF, IB]

The *Age, Gene, and Environment Susceptibility (AGES)* study is funded by NIH contract N01-AG-12100, the NIA Intramural Research Program, Hjartavernd (the Icelandic Heart Association), and the Althingi (the Icelandic Parliament). Genotyping was conducted at the NIA IRP Laboratory of Neurogenetics.

[representing authors: MG, TT, LJJ, MAN, AS, LS]

The *Fenland Study* is funded by the Wellcome Trust and the Medical Research Council. We are grateful to all the volunteers for their time and help and to the General Practitioners and practice staff for help with recruitment. We thank the Fenland Study co-ordination team, the Field Epidemiology team, and the Fenland Study investigators. Biochemical assays were performed by the National Institute for Health Research, Cambridge Biomedical Research Centre, Core Biochemistry Assay Laboratory, and the Cambridge University Hospitals NHS Foundation Trust.

[representing authors: ZY, NF, CL, RL, NW]

The *Malmö Diet & Cancer Study, (Malmö)* was initiated and planned in collaboration with the International Agency for Research on Cancer, the Swedish Cancer Society, and Swedish Medical Research Council and the Faculty of Medicine Lund University, Sweden. The study is also funded by Region Skåne, City of Malmö, Pålsson Foundation and the Swedish Heart and Lung Foundation.

[representing authors: ES, MOM]

**Uppsala Longitudinal Study of Adult Men (ULSAM)** investigators thank Tomas Axelsson, Ann-Christine Wiman and Caisa Pöntinen for their assistance with genotyping. Genotyping was performed by the SNP Technology Platform in Uppsala ([www.genotyping.se](http://www.genotyping.se)). The SNP Technology Platform is supported by Uppsala University and the Knut and Alice Wallenberg Foundation. E.I. was supported by grants from the Swedish Research Council and the Swedish Foundation for Strategic Research.  
[representing authors: UR, PS, EI]

The **Gene-Lifestyle interactions And Complex traits Involved in Elevated disease Risk (GLACIER)** study is nested within the Northern Swedish Health and Disease Study cohort and the Västerbotten Intervention Programme (VIP). We are indebted to the study participants who dedicated their time and samples to these studies. We also thank the VIP and Umeå Medical Biobank staff for biomedical data collection and preparation. We specifically thank John Hutiaainen, Åsa Ågren and Sara Nilsson (Umeå Medical Biobank) for data organization, Kerstin Enquist and Thore Johansson (Västerbottens County Council) for expert technical assistance with DNA preparation, and David Hunter, Patrice Soule and Hardeep Ranu (Harvard School of Public Health) for expert assistance with planning and undertaking genotyping of GLACIER samples. The GLACIER Study was funded by project grants from Novo Nordisk (P.W.F.), the Swedish Heart-Lung Foundation (P.W.F.), the Swedish Diabetes Association (to P.W.F.), Pålssons Foundation (P.W.F.), the Swedish Research Council (P.W.F.), Umeå University Career Development Award (P.W.F.), and The Heart Foundation of Northern Sweden (P.W.F.). F.R. was supported by a post-doctoral stipend from the Swedish Heart-Lung Foundation.  
[representing authors: GH, FBH, IJ, FR, OR, PWF]

The generation and management of GWAS genotype data for the **Rotterdam Study** is supported by the Netherlands Organization of Scientific Research NWO Investments (nr. 175.010.2005.011, 911-03-012), the Research Institute for Diseases in the Elderly (014-93-015; RIDE2), EUROSPAN (European Special Populations Research Network; LSHG-CT-2006-01947), the Netherlands Organization for Scientific Research (Pionier, 047.016.009, 047.017.043; 050-060-810), Erasmus Medical Center and the Centre for Medical Systems Biology (CMSB I and II and Grand; National Genomics Initiative) of the Netherlands Genomics Initiative (NGI); The Rotterdam Study is further funded by Erasmus Medical Center and Erasmus University, Rotterdam, Netherlands Organization for the Health Research and Development (ZonMw), the Research Institute for Diseases in the Elderly (RIDE), the Ministry of Education, Culture and Science, the Ministry for Health, Welfare and Sports, the European Commission (DG XII), and the Municipality of Rotterdam. We thank Pascal Arp, Mila Jhamai, Dr Michael Moorhouse, Marijn Verkerk, and Sander Bervoets for their help in creating the GWAS database. The authors are grateful to the study participants, the staff from the Rotterdam Study and the participating general practitioners and pharmacists.  
[representing authors: FJAvR, EJGS, AGU, AH, CZ, CMvD, JCMW]

**Invecchiare in Chianti (aging in the Chianti area, InCHIANTI)** study investigators thank the Intramural Research Program of the NIH, National Institute on Aging who are responsible for the InCHIANTI samples. Investigators also thank the InCHIANTI participants. The InCHIANTI study baseline (1998-2000) was supported as a "targeted project" (ICS110.1/RF97.71) by the Italian Ministry of Health and in part by the U.S. National Institute on Aging (Contracts: 263 MD 9164 and 263 MD 821336).  
[representing authors: TT, SB, LF]

The **Gene-Diet Attica Investigation on childhood obesity (GENDAI)** and The **Greek Health Randomized Aging Study (GHRAS)** would like to thank all the field investigators for samples and data collection and all the children, their parents and the elderly people for participation in the studies. The GENDAI cohort was supported by a research grant from Coca Cola Hellas.  
[representing authors: SK, CP, AJB, CIG, IP, GD]



Table S1. Participating cohorts

| Cohort                                                             | Study description <sup>1</sup>                                                                                                                                                                                                                                                                                                                                                                                                                                                                                                                                                                                                                                                                                                                                                                                                                                                                                                                                                                     | Web Link and Relevant Reference                                                                                                                                                               |
|--------------------------------------------------------------------|----------------------------------------------------------------------------------------------------------------------------------------------------------------------------------------------------------------------------------------------------------------------------------------------------------------------------------------------------------------------------------------------------------------------------------------------------------------------------------------------------------------------------------------------------------------------------------------------------------------------------------------------------------------------------------------------------------------------------------------------------------------------------------------------------------------------------------------------------------------------------------------------------------------------------------------------------------------------------------------------------|-----------------------------------------------------------------------------------------------------------------------------------------------------------------------------------------------|
| Health, Aging and Body Composition (Health ABC).<br><br><b>USA</b> | The Health ABC study is a prospective cohort study investigating the associations between body composition, weight-related health conditions, and incident functional limitation in older adults. Health ABC enrolled well-functioning, community-dwelling black (n=1281) and white (n=1794) men and women aged 70-79 years between April 1997 and June 1998. Participants were recruited from a random sample of white and all black Medicare eligible residents in the Pittsburgh, PA, and Memphis, TN, metropolitan areas. Participants have undergone annual exams and semi-annual phone interviews. A total of <u>1,249</u> Caucasian participants who attended the second exam in 1998-1999, and who had available genotyping and food frequency data were eligible for the current study.                                                                                                                                                                                                   | <a href="http://www.nia.nih.gov/ResearchInformation/ScientificResources/HealthABCDescription.htm">http://www.nia.nih.gov/ResearchInformation/ScientificResources/HealthABCDescription.htm</a> |
| Cardiovascular Health Study (CHS)<br><br><b>USA</b>                | The CHS is a prospective population-based cohort study of people ≥ 65 years old at baseline initiated to evaluate risk factors for the development and progression of cardiovascular disease. Participants were recruited at four field centers (Forsyth County, NC; Sacramento County, CA; Washington County, MD; Pittsburgh, PA)]. The baseline exam was conducted in 1989-1990. Overall, 5,201 individuals were recruited from random samples of Medicare eligibility lists. A total of <u>2,765</u> adults with available DNA, valid dietary information, and consent to share genetic data were eligible for the current analysis.                                                                                                                                                                                                                                                                                                                                                            | <a href="http://www.chs-nhlbi.org/">http://www.chs-nhlbi.org/</a><br><br>Ann Epidemiol. 1(3): 263-276, 1991 (1)                                                                               |
| Framingham Heart Study (FHS)<br><br><b>USA</b>                     | The Framingham Offspring Study is a community-based longitudinal study designed to examine CVD risk in the offspring of the original participants and their spouses of the Framingham Heart Study cohort. In 1971, 5,124 individuals were enrolled in the study; since then, the cohort has been examined every 3–4 y. Between 1991 and 1995, during the 5th examination cycle, 3,799 adults, with a mean age of 54.98, underwent a standardized medical history and physical examination. Beginning in 2002, 4,095 Gen III participants, who had at least one parent in the offspring cohort, were enrolled in the Framingham Heart Study. At the first cycle of the Gen III study, 4,095 individuals with a mean age of 40 y, underwent the standard clinic examination. For the present study both cohorts were combined for the analysis. A total of <u>5,835</u> adults with available DNA, valid dietary information, and consent to share genetic data were eligible for the current study. | <a href="http://www.framinghamheartstudy.org/">http://www.framinghamheartstudy.org/</a><br><br>Prev Med.4:518–25, 1975 (2)<br>Am J Epidemiol. 165(11):1328-35, 2007 (3)                       |
| Atherosclerosis Risk in Communities (ARIC)<br><br><b>USA</b>       | The ARIC study is a population-based cohort study designed to study of new and established risk factors for atherosclerosis and community trends in coronary heart disease. In 1987-89, baseline data was collected on 15,792 adults, aged 45–64 y, living in four U.S. communities (Forsyth County, NC; Jackson, MI; northwest Minneapolis suburbs, MN; Washington County, MD). The baseline exam was conducted in 1987-89 and information was collected on African Americans, Whites, and a few adults of other ethnicities, aged 45–64 y. After providing informed consent, 15,792 adults were enrolled (8,710 women and 7,082 men). A total of <u>7,201</u> , Caucasian adults with available DNA, valid dietary information, and consent to share genetic data were eligible for the current analysis.                                                                                                                                                                                        | <a href="http://www.csc.unc.edu/aric/">http://www.csc.unc.edu/aric/</a><br><br>Am J Epidemiol. 129(4): 687-702, 1989 (4)                                                                      |
| Family Heart Study (FamHS)<br><br><b>USA</b>                       | The FHS began in 1992 with the ascertainment of 1,200 families (50% randomly sampled, and 50% high risk for CHD). The families (~6,000 individuals,) were sampled on the basis of information on probands from four population-based parent studies: the Framingham Heart Study, the Utah Family Tree Study, and two ARIC centers (Minneapolis, and Forsyth County, NC). Approximately eight years later, study participants belonging to the largest pedigrees were invited for a second clinical exam. A total of 2,767 participants of European descent in 510 extended families were examined. A total of <u>2,094</u> adults with available DNA and who provided valid dietary information were eligible for the current study.                                                                                                                                                                                                                                                               | <a href="https://dsgweb.wustl.edu/PROJECTS/MP1.html">https://dsgweb.wustl.edu/PROJECTS/MP1.html</a><br><br>Higgins et al. Am J Epidemiol. 143 (12): 1219, 1996 (5)                            |

|                                                                                                                 |                                                                                                                                                                                                                                                                                                                                                                                                                                                                                                                                                                                                                                                                                                                                                                                                                                                                                            |                                                                                                                                                                                       |
|-----------------------------------------------------------------------------------------------------------------|--------------------------------------------------------------------------------------------------------------------------------------------------------------------------------------------------------------------------------------------------------------------------------------------------------------------------------------------------------------------------------------------------------------------------------------------------------------------------------------------------------------------------------------------------------------------------------------------------------------------------------------------------------------------------------------------------------------------------------------------------------------------------------------------------------------------------------------------------------------------------------------------|---------------------------------------------------------------------------------------------------------------------------------------------------------------------------------------|
|                                                                                                                 |                                                                                                                                                                                                                                                                                                                                                                                                                                                                                                                                                                                                                                                                                                                                                                                                                                                                                            |                                                                                                                                                                                       |
| The Age, Gene/Environment Susceptibility -Reykjavik Study (AGES)<br><br><b>Iceland</b>                          | The AGES-Reykjavik Study was initiated to examine potential genetic susceptibility and gene/environment interaction as these contribute to disease, disability, and risk of death. AGES-Reykjavik participants are survivors from the Reykjavik Study. The Reykjavik Study, a longitudinal study, began in 1967 and ended in 1994 and recruited over 20,000 participants. Between 2002 and 2006, 5,764 adults with a mean age of 77 years were examined for clinical and subclinical risk factors of vascular, neurocognitive, musculoskeletal, and metabolic diseases of aging. A total of <u>2,819</u> adults with available DNA, dietary information, and consent to share genetic data were eligible for the current analysis.                                                                                                                                                         | <a href="http://www.hjartarannsokn.is/index.aspx?GroupId=346">http://www.hjartarannsokn.is/index.aspx?GroupId=346</a><br><br>Harris T, et al. Am J Epidemiol. 165:1076–1087, 2007 (6) |
| Fenland<br><br><b>UK</b>                                                                                        | The Fenland study is a cross-sectional study of 5,000 individuals aged 30-55 years in Cambridgeshire, UK. This study was designed to examine the interactions between lifestyle and genetic factors on the risk of obesity and related metabolic traits. Healthy men and women born between 1950 and 1975 and registered at medical practices in Cambridgeshire were eligible to participate in this study. For the present study, <u>720</u> adults with available DNA and who provided complete dietary information were eligible for the current study.                                                                                                                                                                                                                                                                                                                                 | <a href="http://www.mrc-epid.cam.ac.uk/Studies/Fenland/">http://www.mrc-epid.cam.ac.uk/Studies/Fenland/</a>                                                                           |
| Malmö Diet and Cancer (Malmö) Study<br><br><b>Sweden</b>                                                        | The Malmö study is a population-based cohort designed to investigate the relationship between dietary factors and certain forms of cancer. At baseline in 1991-1996, a total of 28,449 adults, aged 40 to 70 years were invited to participate in the study. The cardiovascular sub-cohort consists of 6,103 adults (46-68 y, 58% females) randomly selected from the parent Malmö cohort. A total of <u>4,924</u> adults with available DNA and who provided valid dietary information were eligible for the current analysis.                                                                                                                                                                                                                                                                                                                                                            | Berglund, et al. J Intern Med. 233, 45-51, 1993 (7)                                                                                                                                   |
| Uppsala Longitudinal Study of Adult Men (ULSAM)<br><br><b>Sweden</b>                                            | The ULSAM is a longitudinal community-based cohort study aimed at identifying metabolic risk factors for CVD and type 2 diabetes. The study was initiated in 1970-74, when all 50-year old men living in Uppsala were invited to enroll in the study and a follow up study was conducted 20 years later. Of the 1,681 available 70-year old men invited to the follow up study, a total of <u>942</u> non-diabetic adults with available DNA and data from a seven-day registration were eligible for the current analysis.                                                                                                                                                                                                                                                                                                                                                                | <a href="http://www.pubcare.uu.se/ULSAM/">http://www.pubcare.uu.se/ULSAM/</a><br><br>Ingelsson E, et al. JAMA. 294(3):334-341, 2005 (8)                                               |
| Gene-Lifestyle interactions And Complex traits Involved in Elevated disease Risk (GLACIER)<br><br><b>Sweden</b> | The GLACIER Study is a population-based cohort study of ~20,000 adults in the northern Swedish county of Västerbotten. As part of the Västerbotten Intervention Programme (VIP), a health and lifestyle examination was conducted on the majority of GLACIER participants. VIP is an ongoing population-wide project aimed at monitoring the health of Västerbotten residents and providing information on healthful lifestyle behaviors to study participants. Since 1985, all residents of the county of Västerbotten, aged 40-60 years, have been invited to visit their primary health care centre for clinical examinations. For the present study, non-diabetic adults with available DNA, valid dietary information, and consent to share genetic data were eligible for the current analysis ( <u>891</u> samples for insulin analyses; up to <u>14,913</u> for glucose analyses). | Renström F, et al. Hum Mol Genet. 18(8):1489-96, 2009 (9)<br>Hallmans G, et al. Scand J Public Health Suppl.61:18-24, 2003 (10)                                                       |

|                                                                               |                                                                                                                                                                                                                                                                                                                                                                                                                                                                                                                                                                                                                                                                                                       |                                                                                                                                                                   |
|-------------------------------------------------------------------------------|-------------------------------------------------------------------------------------------------------------------------------------------------------------------------------------------------------------------------------------------------------------------------------------------------------------------------------------------------------------------------------------------------------------------------------------------------------------------------------------------------------------------------------------------------------------------------------------------------------------------------------------------------------------------------------------------------------|-------------------------------------------------------------------------------------------------------------------------------------------------------------------|
| Rotterdam Study<br><b>Netherlands</b>                                         | The Rotterdam Study is a prospective population-based cohort study designed to investigate the prevalence and incidence of and risk factors for chronic diseases in the elderly. The baseline exam was conducted between 1990 and 1993 in Ommoord, a suburb of Rotterdam. A total of 7,983 adults, aged 55 years and over, participated in the study. A total of <u>2,304</u> adults with available DNA, valid dietary information, and consent to share genetic data were eligible for the current analysis.                                                                                                                                                                                         | <a href="http://www.epib.nl/research/ergo.htm">http://www.epib.nl/research/ergo.htm</a><br>Hofman A, et al. Eur J Epidemiol. 24(9):553-572, 2009 (11)             |
| Invecchiare in Chianti (aging in the Chianti area, InCHIANTI)<br><b>Italy</b> | InCHIANTI is a population-based study designed to evaluate the factors that influence mobility in older people in the Chianti region of Tuscany, Italy. A total of 1,616 residents were selected from the population registry of Greve (a rural area: 11,709 residents with 19.3% of the population greater than 65 years of age), and Bagno a Ripoli (Antella village near Florence; 4,704 inhabitants, with 20.3% greater than 65 years of age). The participation rate was 90% (n=1453), and the participants ranged between 21-102 years of age. For the present study, <u>1,071</u> adults with available DNA and who provided complete dietary information were eligible for the current study. | <a href="http://www.inchiantistudy.net/bindex.html">http://www.inchiantistudy.net/bindex.html</a><br>Ferrucci L, et al. J Am Geriatr Soc. 48:1618-1625, 2000 (12) |
| Gene-Diet Attica Investigation on Childhood Obesity (GENDAI)<br><b>Greece</b> | The GENDAI study examines the contribution of genetics and nutrition, and the potential interactions between them, to childhood obesity. Between November 2005 and June 2006, 900-1000 registered fifth- and sixth-grade children, from 40 primary schools in the Attica region of Greece, were enrolled in this study. Parents or guardians of interested students signed a written informed consent form and participating children provided verbal assent. For the present study, only <u>1,087</u> children with available DNA, valid dietary information, and consent to share genetic data were eligible for the current analysis.                                                              | Papoutsakis et al. Clin Chem Lab Med. 45(3): 039-315, 2007 (13)                                                                                                   |
| Greek Health Randomized Aging Study (GHRAS)<br><b>Greece</b>                  | GHRAS is a cross-sectional health and nutrition study conducted in elderly ( $\geq 60$ y) urban Greek adults. Between 2004 and 2008, a randomly selected group of 800 adults, who were members of the "Centers of Open Protection for the Elderly" in the Athens region, were selected to participate. The Centers of Open Protection for the Elderly is a public entity that provides assistance from social workers, first-degree medical care, and recreational activities for the elderly. A total of <u>865</u> adults with available DNA, valid dietary information, and consent to share genetic data were eligible for the current analysis.                                                  | Kanoni & Dedoussis. Med Sci Monit 2008; 14(4): CR204-212 (14)                                                                                                     |

<sup>1</sup> All protocols were approved by each field center's institutional review board. Study participants were of European descent. Exclusion criteria included prevalent diabetes. Validity of dietary data was determined differently by each cohort.

Table S2. Characterization of whole grain intake in each of 14 cohorts

|            | Dietary Assessment Method | Description                                                                                                                                                                                                                                                                                                                                                                                                                                                                                                                                                                                                                                                                                                                                                                                                                                                                                                       | FFQ Line items / Top contributing Food Groups                                                                                                                                                            |
|------------|---------------------------|-------------------------------------------------------------------------------------------------------------------------------------------------------------------------------------------------------------------------------------------------------------------------------------------------------------------------------------------------------------------------------------------------------------------------------------------------------------------------------------------------------------------------------------------------------------------------------------------------------------------------------------------------------------------------------------------------------------------------------------------------------------------------------------------------------------------------------------------------------------------------------------------------------------------|----------------------------------------------------------------------------------------------------------------------------------------------------------------------------------------------------------|
| Health ABC | FFQ                       | <p>A 108-item interviewer-administered FFQ (Block Dietary Data Systems, Berkeley, CA). Participants were asked to indicate how often, on average, they consumed various foods and beverages over the past year according to nine frequency categories, ranging from “never” to “every day”. Portion size information was collected by trained interviewers using wood blocks, food models, standard kitchen measures, and flash cards to help participants estimate portion sizes. Individuals with serious errors (skipped &gt;15% of items or reported &lt;3 or &gt;20 foods/day) on the FFQ and those who reported energy intakes less than 500 kcal/d or greater than 3,500 kcal/d in women and less than 800 kcal/d or greater than 4,000 kcal/d in men were excluded.</p> <p><b>Related References:</b> Houston et al. Am J Clin Nutr. 2008; 87(1):150-5. (15)</p>                                          | <p><b>Three Line Items:</b></p> <p>Whole wheat, rye or other dark breads</p> <p>High-fiber cold cereal</p> <p>Cooked cereal</p>                                                                          |
| CHS        | FFQ                       | <p>Usual dietary intake was assessed using a picture-sort version of the National Cancer Institute FFQ. This is a 99-item, self-administered FFQ. Participants were asked to indicate how often, on average, they consumed various foods and beverages over the past year according to 9 frequency categories, ranging from never to <math>\geq 5</math> times per week.. Portion sizes were illustrated by color pictures or laminated 4 X 6 in (10 X 15 cm) index card with a black-and white line drawing. Dietary information was judged as unreliable and excluded from further analysis if calculated total kilocalories were &lt; 500 or &gt; 5000 kcal/d.</p> <p><b>Related References:</b> Kumanyika S, et al. J Am Diet Assoc. 1996 Feb;96(2):137-44. (16)</p>                                                                                                                                          | <p><b>Three Line Items:</b></p> <p>Whole wheat, rye, or pumpernickel bread</p> <p>Whole grain cold cereal</p> <p>Cooked cereal</p>                                                                       |
| FHS        | FFQ                       | <p>A self-administered 126-item FFQ. Participants were asked to indicate how often, on average, they consumed various foods and beverages over the past year according to 9 frequency categories, ranging from never or &lt;1 time/mo to <math>\geq 6</math> times/d. Portion sizes were specified. Separate questions about the use of vitamin and mineral supplements and the type of breakfast cereal most commonly consumed were also included in the FFQ. Dietary information was judged as unreliable and excluded from further analysis if reported energy intakes were &lt; 2.51 MJ/d (600 kcal/d) or &gt; 16.74 MJ/d (4000 kcal/d) for women and &gt; 17.57 MJ/d (4200 kcal/d) for men or if <math>\geq 12</math> food items were left blank.</p> <p><b>Related References:</b> Rimm et al. Am J Epidemiol 1992;135:1114–26, 1127–36. (17)<br/>Salvini S et al. Int J Epidemiol 1989;18:858–67. (18)</p> | <p><b>Eight Line Items:</b></p> <p>Dark bread</p> <p>Cooked oatmeal</p> <p>Whole grain cold cereal</p> <p>Brown rice</p> <p>Bulgur/kasha/couscous</p> <p>Popcorn</p> <p>Added bran</p> <p>Wheat germ</p> |
| ARIC       | FFQ                       | <p>An interviewer-administered, 66-item semi-quantitative FFQ that was modified from the validated Willett 61-item FFQ (19) (modifications described elsewhere (20)). Participants were asked to indicate how often, on average, they consumed various foods and beverages over the past year according to 9 frequency</p>                                                                                                                                                                                                                                                                                                                                                                                                                                                                                                                                                                                        | <p><b>Three Line Items:</b></p>                                                                                                                                                                          |

|                |                       |                                                                                                                                                                                                                                                                                                                                                                                                                                                                                                                                                                                                                                                                                                                                                                                                      |                                                                                                                                                         |
|----------------|-----------------------|------------------------------------------------------------------------------------------------------------------------------------------------------------------------------------------------------------------------------------------------------------------------------------------------------------------------------------------------------------------------------------------------------------------------------------------------------------------------------------------------------------------------------------------------------------------------------------------------------------------------------------------------------------------------------------------------------------------------------------------------------------------------------------------------------|---------------------------------------------------------------------------------------------------------------------------------------------------------|
|                |                       | <p>categories, ranging from never or &lt;1 time/mo to ≥6 times/d. Standard portion sizes given as a reference for intake estimation. Supplementary questions included regarding frequency of fried food consumption and brand name of the breakfast cereal most commonly consumed (open-ended response). Dietary information was judged as unreliable and excluded from further analysis if total energy intake was estimated to be &lt;500 or &gt;3600 kcal for women and &lt;600 or &gt;4200 kcal for men or if 10 or more items of the FFQ were unanswered.</p> <p><b>Related References:</b> Willett WC, et al. Am J Epidemiol. Jul 1985;122(1):51-65. (19)<br/>Stevens J et al. Nutrition Research 1996;16: 735-745. (20)</p>                                                                   | <p>Dark bread</p> <p>Whole grain cold cereal (by self-reported brand name)</p> <p>Cooked cereal</p>                                                     |
| <b>FamHS</b>   | FFQ                   | <p>A 66-item questionnaire modified from the Willett FFQ administered by trained interviewers. Participants were asked to indicate how often, on average, they consumed various foods and beverages over the past year according to 9 frequency categories, ranging from never or &lt;1 time/mo to ≥6 times/d. Portion sizes were specified. Dietary information was judged as unreliable and excluded from further analysis if reported energy intakes were &lt;3347.2kJ/day (799.3 kcal/day) or &gt;17572.8 kJ/day (4196.4 kcal/day) for men and &lt;2510.4 kJ/d (599.5 kcal/day) or &gt;14644 kJ/day (3497 kcal/day) for women.</p> <p><b>Related References:</b> Stein AD et al. Am J Epidemiol 1992;135(6):667-677. (21)<br/>Willett WC, et al. Am J Epidemiol. Jul 1985;122(1):51-65. (19)</p> | <p><b>Three Line Items:</b></p> <p>Dark bread</p> <p>Whole grain cold cereal (by self-reported brand name)</p> <p>Cooked cereal</p>                     |
| <b>AGES</b>    | Dietary Questionnaire | <p>A self-administered 30-item dietary practice questionnaire was reviewed by a trained interviewer. Specific questionnaire items were customized to capture food consumption of unique Icelandic foods. Participants were asked to report how often, on average, they consumed various Icelandic foods in a typical week according to seven frequency categories, ranging from never to more than once per day. Portion sizes were not specified.</p>                                                                                                                                                                                                                                                                                                                                               | <p><b>Three Line Items:</b></p> <p>Rye bread</p> <p>Whole wheat or coarse-grain bread</p> <p>Oatmeal or muesli</p>                                      |
| <b>Fenland</b> | FFQ                   | <p>A self-administered 130-item semi-quantitative Willett FFQ. The lists of foods were modified to reflect important sources of nutrients in the average British diet. Food and macronutrient intakes were estimated in grams per day. Participants were asked to indicate how often, on average, they consumed various foods and beverages over the past year according to 9 frequency categories, ranging from never or &lt;1 time/mo to ≥6 times/d. Portion sizes were specified.</p>                                                                                                                                                                                                                                                                                                             | <p><b>Five Line Items:</b></p> <p>Wholemeal bread</p> <p>Porridge/readybrek</p> <p>Whole grain cold cereal</p> <p>Brown rice</p> <p>Wholemeal pasta</p> |
| <b>Malmö</b>   | Modified diet         | <p>Participants visited the study centre on two occasions. During the first visit, trained staff gave detailed instructions about the dietary data collection procedure, and distributed the dietary questionnaire and</p>                                                                                                                                                                                                                                                                                                                                                                                                                                                                                                                                                                           | <p>Whole grain products were originally defined from the modified diet history</p>                                                                      |

|                |                   |                                                                                                                                                                                                                                                                                                                                                                                                                                                                                                                                                                                                                                                                                                                                                                                                                                                                                                                                                                                                                                                                                                                                                                                                                                                                                                                                                                                                                                                                                                                             |                                                                                                                                                                                                                                                                                                                       |
|----------------|-------------------|-----------------------------------------------------------------------------------------------------------------------------------------------------------------------------------------------------------------------------------------------------------------------------------------------------------------------------------------------------------------------------------------------------------------------------------------------------------------------------------------------------------------------------------------------------------------------------------------------------------------------------------------------------------------------------------------------------------------------------------------------------------------------------------------------------------------------------------------------------------------------------------------------------------------------------------------------------------------------------------------------------------------------------------------------------------------------------------------------------------------------------------------------------------------------------------------------------------------------------------------------------------------------------------------------------------------------------------------------------------------------------------------------------------------------------------------------------------------------------------------------------------------------------|-----------------------------------------------------------------------------------------------------------------------------------------------------------------------------------------------------------------------------------------------------------------------------------------------------------------------|
|                | history with FFQ  | <p>menu book. At the second visit (after approximately 2 weeks) individual interviews were conducted by trained diet interviewers to complete the diet history and to check for completed questionnaire. The 7 day menu book collected information on cooked lunch and dinner meals, cold beverages, and supplements. The 168-item dietary questionnaire covered foods regularly consumed during past year. Usual portion sizes were estimated using a booklet containing 48 photographs. During the 1-h interview, the participants were asked questions about food choices, portion sizes (using a more extensive book of photos) and food preparation practices. Overlapping information and very high reported intakes were also checked. Regular use of supplements was recorded in a questionnaire. The average daily intake of foods (grams per day) was calculated based on the information available in the menu book (and interview) and questionnaire. Food intake was converted to nutrient intake using a database specifically developed for the Malmö study and originated from the Swedish National Food Administration. Dietary information was judged reliable by a trained interviewer during the 1-hour diet interview.</p> <p><b>Related References:</b> Elmstahl et al. Eur J Clin Nutr 1996; 50:134-42. (22)<br/> Elmstahl et al. Eur J Clin Nutr 1996; 50:143-51. (23)<br/> Riboli et al. Int J Epidemiol 1997; 26 Suppl 1: S161-73. (24)<br/> Callmer et al. J Intern Med 1993; 233,53-7. (25)</p> | <p>which included 23 items for cereals, 7 for bread and 14 for crisp bread. Items were grouped together according to assumed fiber content for inclusion on the FFQ</p> <p><b>Three Line Items:</b></p> <p>Bread with &gt;6% fiber</p> <p>Grain crisps with &gt;10% fiber</p> <p>Cereals with more than 10% fiber</p> |
| <b>ULSAM</b>   | 7-day food record | <p>A 7-day food record, using an optically readable form (OMR) in a subset of 1,138 men. The participants were given oral instructions by a dietitian on how to perform the dietary registration. Each subject recorded their dietary intake in the OMR book, by marking a horizontal pencil stroke in an oval. The menu book included written instructions with an example of how to complete the book. The record sheets started with "day 1" followed by six additional days. For each meal (breakfast, lunch, dinner and snacks) the respondent was asked to specify where and at what time the meal was eaten. The amounts consumed were reported in household measurements or specified as portion sizes according to a photograph showing four different portion sizes. Food items that were eaten, but not described in the menu book, were to be reported as "others". For food not found as a pre-coded alternative and for snacks, some additional coding by a dietitian was needed prior to data input. Dietary information was judged as unreliable and excluded from further analysis if total energy intake was +/- 3SD from the mean energy intake.</p> <p><b>Related References:</b> Becker W, Lennernäs MM, Gustafsson I-B et al. Food intake. The Sixth Nordic Conference in Nutrition. Göteborg, Sweden, 1996</p>                                                                                                                                                                                       | <p><b>Top-contributing foods:</b></p> <p>Whole grain bread</p> <p>Hot Cereals (mainly porridge)</p>                                                                                                                                                                                                                   |
| <b>GLACIER</b> | FFQ               | <p>Using a 66-item, self administered FFQ, participants were asked to indicate how often, on average, they consumed various foods and beverages over the past year according to 9 frequency categories, ranging from never to 4 or more a day. Participants indicated their average portion of (1) potato/pasta/rice, (2) vegetables and (3) meat/ground meat/sausages by comparison with four colour photos illustrating four plates with increasing portion sizes of potato, vegetables and meat. For the other food items, we assumed a standard portion size value (as described by the National Food administration's statistics database, <a href="http://www.slv.se">www.slv.se</a>). Dietary information was judged as unreliable and excluded from further analysis if estimated energy intake was &lt;2.5% or &gt;95% for the entire Northern Sweden FFQ database (N~93,000 observations). Energy intake values were calculated as estimated energy intake divided by estimated basal metabolic (using the equations defined by Schofield, 1985).</p> <p><b>Related References:</b> Johansson I et al, Public Health Nutr, 2002; 5(3):487-496. (26)<br/> Johansson G, et al, Public Health Nutr, 2001; 4(4): 919-927. (27)</p>                                                                                                                                                                                                                                                                                    | <p><b>Four Line Items:</b></p> <p>Whole grain coarse bread</p> <p>Rye crisp bread</p> <p>High-fiber cold cereals</p> <p>Porridge oat, graham, rye, barley</p>                                                                                                                                                         |

|                        |              |                                                                                                                                                                                                                                                                                                                                                                                                                                                                                                                                                                                                                                                                                                                                                                                                                                                                                                                                                                                                                                                                                                                                                                                                                                                                         |                                                                                                                                                                                                       |
|------------------------|--------------|-------------------------------------------------------------------------------------------------------------------------------------------------------------------------------------------------------------------------------------------------------------------------------------------------------------------------------------------------------------------------------------------------------------------------------------------------------------------------------------------------------------------------------------------------------------------------------------------------------------------------------------------------------------------------------------------------------------------------------------------------------------------------------------------------------------------------------------------------------------------------------------------------------------------------------------------------------------------------------------------------------------------------------------------------------------------------------------------------------------------------------------------------------------------------------------------------------------------------------------------------------------------------|-------------------------------------------------------------------------------------------------------------------------------------------------------------------------------------------------------|
|                        |              | Wennberg M, et al. Public Health Nutr. 2009; 12(9): 1477-1484. (28)                                                                                                                                                                                                                                                                                                                                                                                                                                                                                                                                                                                                                                                                                                                                                                                                                                                                                                                                                                                                                                                                                                                                                                                                     |                                                                                                                                                                                                       |
| <b>Rotterdam Study</b> | FFQ          | <p>Dietary assessment followed a two-step procedure:</p> <p>1) A simple self-administered questionnaire was first completed at home, only questions were asked about which food items were consumed; no questions about portion sizes (or frequency) were asked during this step.</p> <p>2) A subsequent structured interview was later conducted at the research center with a trained dietitian. Participants were asked to indicate how often, on average, they consumed various foods and beverages over the past year according to 9 frequency categories, ranging from never or &lt;1 time/mo to ≥6 times/d. Portion sizes were presented in natural units (eg. slices of bread) or household measures (e.g., cups, bowls, tablespoons, plates, etc.) Nutritional supplement intakes were not considered because dose and duration were not recorded with sufficient accuracy. Dietary information was judged as unreliable and excluded from further analysis if a dietician considered the reported dietary intake unreliable, i.e. because participant's answers during the dietary interview were either too inconsistent or too incomplete.</p> <p><b>Related References:</b> Klipstein-Grobusch K, et al. Eur J Clin Nutr. 1998 Aug; 52(8):588-96. (29)</p> | <p><b><u>Eight Line Items:</u></b></p> <p>Wheat bread</p> <p>Rye bread</p> <p>Wholemeal bread</p> <p>Porridge oatmeal</p> <p>Muesli</p> <p>Brown rice, boiled</p> <p>Wheat germ</p> <p>Wheat bran</p> |
| <b>InCHIANTI</b>       | FFQ          | <p>A 236 item, interviewer administered FFQ that investigates how frequently (weekly, monthly, yearly) each specific food was generally consumed. Participant is asked to specify the size of the portion usually consumed, in comparison to a range of portion that are shown in colored photographs. Nutrient data for specific foods were obtained from the Food Composition Database for Epidemiological Studies in Italy (18). Dietary information was judged as unreliable and excluded from further analysis if reported energy intakes less than 600 kcal/d or greater than 4,000 kcal/d and 4,200 kcal/d in women and men, respectively.</p> <p><b>Related References:</b> Bartali et al. Arch. Gerontol Geriatr. Geriatr. 38 2004; 51–60. (30)<br/>Pisani et al. Int J Epidemiol. 1997; 26:152–160. (31)</p>                                                                                                                                                                                                                                                                                                                                                                                                                                                  | <p><b><u>One Line Item:</u></b></p> <p>Whole grain bread</p>                                                                                                                                          |
| <b>GENDAI</b>          | 24-h recalls | <p>Two 24-h recalls on non consecutive days. The second recall was conducted 3–10 days after the first recall and on a different day of the week. A standardized protocol describing interviewing and recording techniques was implemented during the 24-h recalls to enhance accuracy and completeness. Food models and sample measures (such as cups and spoons) were used to specify serving sizes. The consumption of vitamin and mineral supplements was recorded. The 24-h recall data were analyzed using Nutritionist Pro software, version 2.2 (Axxya Systems-Nutritionist Pro, Stafford,TX, USA). The Nutritionist Pro food database</p>                                                                                                                                                                                                                                                                                                                                                                                                                                                                                                                                                                                                                      | <p><b><u>Top-contributing foods:</u></b></p> <p>Whole wheat or rye bread</p> <p>Whole wheat or rye melba toast</p>                                                                                    |

|              |     |                                                                                                                                                                                                                                                                                                                                                                 |                                                                                                                 |
|--------------|-----|-----------------------------------------------------------------------------------------------------------------------------------------------------------------------------------------------------------------------------------------------------------------------------------------------------------------------------------------------------------------|-----------------------------------------------------------------------------------------------------------------|
|              |     | was expanded by adding analyses of traditional Greek foods and recipes, and nutrient information for local processed food items (mainly snack foods, sweets, and fast foods) as shared by industry. Dietary information was judged as unreliable and excluded from further analysis if total energy intake was +/- 3SD from the mean energy intake.             | Whole wheat or barley rusk<br>High-fiber cold cereal<br>Whole wheat pasta<br>Brown rice<br>Whole wheat crackers |
| <b>GHRAS</b> | FFQ | A 55-item, interviewer administered FFQ. Participants were asked to indicate how often, on average, they consumed various foods and beverages over the past year according daily, weekly, or monthly. Portion size was specified (1 slice). Dietary information was judged as unreliable and excluded from further analysis if total energy intake was +/- 3SD. | <b><u>One Line Item:</u></b><br>Whole wheat bread                                                               |



Table S3. Genotyping

| COHORT     | Genotyping platform               | Imputed genotypes (yes/no)                                                                                                                                                                                                                                                                                                                                                                                                                 | Imputation method | Quality control and other procedural details                                                                                                                                                                                                                                                                                                                                                                                                                                                                                                                                                                                                                                                                                            |
|------------|-----------------------------------|--------------------------------------------------------------------------------------------------------------------------------------------------------------------------------------------------------------------------------------------------------------------------------------------------------------------------------------------------------------------------------------------------------------------------------------------|-------------------|-----------------------------------------------------------------------------------------------------------------------------------------------------------------------------------------------------------------------------------------------------------------------------------------------------------------------------------------------------------------------------------------------------------------------------------------------------------------------------------------------------------------------------------------------------------------------------------------------------------------------------------------------------------------------------------------------------------------------------------------|
| Health ABC | Illumina Human1M-Duo BeadChip     | 11 SNPs were imputed:<br><i>rs11708067</i> ,<br><i>rs11920090</i> ,<br><i>rs2191349</i> ,<br><i>rs7034200</i> ,<br><i>rs10885122</i> ,<br><i>rs4506565</i> ,<br><i>rs11605924</i> ,<br><i>rs7944584</i> ,<br><i>rs174550</i> ,<br><i>rs10830963</i> ,<br><i>rs1107165</i><br>6 SNPs were directly genotyped:<br><i>rs340874</i> ,<br><i>rs780094</i> ,<br><i>rs560887</i> ,<br><i>rs4607517</i> ,<br><i>rs11558471</i> ,<br><i>rs35767</i> | MACH              | Genotyping was performed by the Center for Inherited Disease Research (CIDR) using the Illumina Human1M-Duo BeadChip system. Samples were excluded from the dataset for the reasons of sample failure, genotypic sex mismatch, and first-degree relative of an included individual based on genotype data. Genotyping was successful in 1663 participants of European descent. Analysis was restricted to SNPs with minor allele frequency $\geq 1\%$ , call rate $\geq 97\%$ and HWE $p \geq 10^{-6}$ . Genotypes were available on 914,263 high quality SNPs for imputation based on the HapMap CEU (release 22, build 36) using the MACH software (version 1.0.16).                                                                  |
| CHS        | Illumina HumanCNV370-Duo BeadChip | 12 imputed;<br>not imputed =<br><i>rs340874</i> ,<br><i>rs4607517</i> ,<br><i>rs560887</i> ,<br><i>rs780094</i>                                                                                                                                                                                                                                                                                                                            | BIMBAM10 v0.91    | CHS study samples were genotyped using the Illumina HumanCNV370-Duo BeadChip system. African American participants were excluded from analyses. Genotyping was successful in 3,291 participants of European descent free of cardiovascular disease at baseline. The following exclusions were applied to identify a final set of 332,946 SNPs: call rate $>95\%$ , HWE $P > 10^{-5}$ , 2 duplicate errors or Mendelian inconsistencies (for reference CEPH trios). Imputation was performed using BIMBAM10 v0.91 with reference to HapMap CEU using release 21A, build 35 using one round of imputations and the default expectation-maximization warm-ups and runs. SNPs were excluded for variance on the allele dosage $\leq 0.01$ . |
| FHS        | Affymetrix 500K and MIPS 50K      | Yes                                                                                                                                                                                                                                                                                                                                                                                                                                        | MACH              | FHS study samples were genotyped using Affymetrix 500K (250K Nsp and 250K Sty) and MIPS 50K. Samples QC: call rate filter was set at $> 97\%$ ; heterozygosity filter was set at 5 SD from the mean; samples were excluded if $> 1000$ Mendelian errors. SNPs QC: MAF $>1\%$ ; HWE $< 10^{-6}$ ; call rate $> 95\%$ . Imputation was made using MACH software: Ratio of variance of dosage to expected variance under binomial model $>0.3$ .                                                                                                                                                                                                                                                                                           |

|                |                                                                       |                                     |        |                                                                                                                                                                                                                                                                                                                                                                                                                                                                                                                                                                                                                                                                                              |
|----------------|-----------------------------------------------------------------------|-------------------------------------|--------|----------------------------------------------------------------------------------------------------------------------------------------------------------------------------------------------------------------------------------------------------------------------------------------------------------------------------------------------------------------------------------------------------------------------------------------------------------------------------------------------------------------------------------------------------------------------------------------------------------------------------------------------------------------------------------------------|
| <b>ARIC</b>    | Affymetrix 6.0                                                        | Yes                                 | MACH   | ARIC Study samples were genotyped using the Affymetrix Genome-Wide Human SNP Array 6.0 (Santa Clara, California); for the current analysis only white participants were analyzed. Sample exclusion criteria included discordant with previous genotype data, genotypic and phenotypic sex mismatch, suspected first-degree relative of an included individual based on genotype data, genetic outlier as assessed by Identity by State (IBS) using PLINK and >8 SD along any of the first 10 principal components in EIGENSTRAT with 5 iterations. Autosomal SNPs were used for imputation after exclusion of SNPs with HWE deviation $p < 5 \times 10^{-5}$ , call rate <95%, or MAF <1%.   |
| <b>FamHS</b>   | Illumina HumMap chip (974 on 550K, 249 on 610K, and 1482 on 1Million) | Yes                                 | MACH   | All participants were typed on an Illumina HumMap chip. The initial 974 were typed with 550K density; 249 were typed at 610K, and the remaining 1482 at 1M. Of these, 34 (3.3%) were excluded due to technical errors, call rates below 98%, and discrepancies between reported sex and sex-diagnostic markers. There was no significant plate-to-plate variation in allele frequencies.                                                                                                                                                                                                                                                                                                     |
| <b>AGES</b>    | Illumina 370CNV BeadChip array                                        | Yes                                 | MACH   | Genotyping was performed using the Illumina 370CNV BeadChip array on 3,664 participants. Sample exclusion criteria included sample failure, genotype mismatch with reference panel, and sex mismatch, resulting in clean genotype data on 3,219 participants. Standard protocols for working with Illumina data were followed with clustering score greater than 0.4. From a total of 353,202 SNPs, 325,094 were used for imputation after exclusion of SNPs with call rate <97%, HWE deviation $< 1 \times 10^{-6}$ , mishap (PLINK haplotype-based test for non-random missing genotype data [2]) $p < 1 \times 10^{-9}$ , and mismatched positions between Illumina, dbSNP and/or HapMap. |
| <b>Fenland</b> | Affymetrix using the BRLMM calling algorithm                          | 15 imputed; not imputed = rs4506565 | IMPUTE | All samples were genotyped using the Affymetrix 500K array set. Samples QC: call rate filter was set at > 95% with 1 individual excluded; heterozygosity upperband 0.28822 lowerband 0.27348, 81 participants were excluded. SNPs QC: MAF >1%; HWE < $10^{-6}$ . Imputation was made using IMPUTE (v0.4.2) with MAF set at >1%                                                                                                                                                                                                                                                                                                                                                               |
| <b>Malmö</b>   | Sequenom (GCK, FADS1, TCF7L2) Taqman (GCKR)                           | No                                  | NA     | The SNPs were genotyped using either the iPLEX Sequenom MassARRAY platform (GCK, TCF7L2, FADS1) or allelic discrimination (GCKR) on an ABI 7900 instrument (Applied Biosystems). All genotyped SNPs had a genotyping call rate >95% (mean 97.8%) and a Hardy-Weinberg equilibrium $P < 0.10$ .                                                                                                                                                                                                                                                                                                                                                                                               |
| <b>ULSAM</b>   | SNPstream GetGenos (Beckman Coulter)                                  | No                                  | NA     | The SNPs were genotyped by multiplex minisequencing (fluorescent single base extension) using the SNPstream system (Beckman Coulter) (Ref: Bell PA, Chaturvedi S, Gelfand CA, Huang CY, Kochersperger M, Kopla R, Modica F, Pohl M, Varde S, Zhao R, Zhao X, Boyce-Jacino MT. SNPstream UHT: ultra-high throughput SNP genotyping for pharmacogenomics and drug discovery. Biotechniques. 2002; 30:S70-77). SNP QC filters: MAF >5%; HWE < $10^{-3}$ ; Call rate >93%. Average SNP call rate: 0.97777335625. Sample QC filters: Call rate >95%. Average sample call rate: 0.97629158                                                                                                         |
| <b>GLACIER</b> | OpenArray SNP Genotyping System (BioTrove, Woburn, MA, U.S.A)         | No                                  | N/A    | All participants were of Northern European ancestry (white Swedish). DNA was extracted at the Medical Biobank in Umeå from peripheral white blood cells. Genomic DNA samples were subsequently diluted to 4 ng/µl. Genotyping was undertaken at the Wellcome Trust Sanger Institute (Hinxton, UK) using OpenArray SNP Genotyping System (BioTrove, Woburn, MA, U.S.A), in accordance with the recommended protocols. Approximately 10% duplicate samples were included for the assessment of genotyping concordance. The mean concordance was 99.3% and the mean success rate was 98.4%                                                                                                      |

|                  |                           |     |      |                                                                                                                                                                                                                                                                                                                                                                                                                                                                                                                                                                                                  |
|------------------|---------------------------|-----|------|--------------------------------------------------------------------------------------------------------------------------------------------------------------------------------------------------------------------------------------------------------------------------------------------------------------------------------------------------------------------------------------------------------------------------------------------------------------------------------------------------------------------------------------------------------------------------------------------------|
| <b>Rotterdam</b> | Illumina 550K             | Yes | MACH | Genotyping was conducted using the Illumina 550K array among participants of self-reported European descent, and succeeded in 6,240 participants (sample call rate = 97.5%). We excluded participants for excess autosomal heterozygosity, mismatch between called and phenotypic gender, or being outliers identified by the IBS clustering analysis. The final population for genetic analysis comprised 5,974 participants. SNPs were excluded for minor allele frequency <1% , Hardy-Weinberg equilibrium p-value<10 <sup>-6</sup> , or SNP call rate <90% resulting in data on 530683 SNPs. |
| <b>InCHIANTI</b> | Illumina 550K             | Yes | MACH | Genotyping in InCHIANTI was conducted using Illumina 550K. Samples QC: call rate filter was set at > 98.5%; sex misspecification. SNPs QC: MAF >1%; HWE > 10 <sup>-4</sup> ; call rate > 99%. Imputation was made using MACH software: Ratio of variance of dosage to expected variance under binomial model >0.3, MAF > 1%.                                                                                                                                                                                                                                                                     |
| <b>GENDAI</b>    | Applied Biosystems Taqman | No  | N/A  | Genotyping was performed using Taqman (Applied Biosystems), in accordance with the recommended protocols. The mean call rate for all SNPs was >95%                                                                                                                                                                                                                                                                                                                                                                                                                                               |
| <b>GHRAS</b>     | Applied Biosystems Taqman | No  | N/A  | Genotyping was performed using Taqman (Applied Biosystems), in accordance with the recommended protocols. The mean call rate for all SNPs was >95%                                                                                                                                                                                                                                                                                                                                                                                                                                               |

Table S4. Effect allele frequencies for investigated SNPs in each of 14 cohorts

| <i>Nearest Gene</i> | <i>SNP</i> | <b>Risk-raising allele<sup>1</sup></b> | <b>Health ABC</b> | <b>CHS</b> | <b>FHS</b> | <b>ARIC</b> | <b>FamHS</b> | <b>AGES</b> | <b>Fenland</b> | <b>Malmö</b>       | <b>ULSAM</b>       | <b>GLACIER</b>     | <b>Rotterdam</b> | <b>InCHIAN TI</b> | <b>GENDAI</b>      | <b>GHRAS</b>       |
|---------------------|------------|----------------------------------------|-------------------|------------|------------|-------------|--------------|-------------|----------------|--------------------|--------------------|--------------------|------------------|-------------------|--------------------|--------------------|
| <i>PROX1</i>        | rs340874   | C                                      | 0.535             | 0.527      | 0.528      | 0.532       | 0.573        | 0.569       | 0.556          | NA                 | 0.525              | 0.529              | 0.568            | 0.535             | 0.508              | 0.518              |
| <i>GCKR</i>         | rs780094   | C                                      | 0.603             | 0.573      | 0.554      | 0.602       | 0.594        | 0.648       | 0.628          | 0.650              | 0.659              | 0.715              | 0.634            | 0.470             | 0.522              | 0.540              |
| <i>G6PC2</i>        | rs560887   | C                                      | 0.708             | 0.712      | 0.703      | 0.704       | 0.692        | 0.692       | 0.713          | NA                 | 0.664              | 0.709              | 0.684            | 0.710             | 0.715              | 0.708              |
| <i>ADCY5</i>        | rs11708067 | A                                      | 0.777             | 0.782      | 0.791      | 0.774       | 0.780        | 0.788       | 0.764          | NA                 | 0.779              | 0.794              | 0.730            | 0.848             | 0.842 <sup>2</sup> | 0.803 <sup>2</sup> |
| <i>SLC2A2</i>       | rs11920090 | T                                      | 0.867             | 0.862      | 0.867      | 0.866       | 0.865        | 0.896       | 0.873          | NA                 | 0.872              | 0.860              | 0.868            | 0.845             | 0.834              | 0.837              |
| <i>DGKB/TMEM195</i> | rs2191349  | T                                      | 0.543             | 0.549      | 0.557      | 0.536       | 0.540        | 0.509       | 0.551          | NA                 | 0.498              | 0.492              | 0.537            | 0.571             | 0.554              | 0.558              |
| <i>GCK</i>          | rs4607517  | A                                      | 0.159             | 0.185      | 0.181      | 0.170       | 0.161        | 0.130       | 0.178          | 0.150 <sup>6</sup> | 0.148              | 0.151              | 0.182            | 0.199             | 0.179              | 0.195              |
| <i>SLC30A8</i>      | rs11558471 | A                                      | 0.709             | 0.677      | 0.736      | 0.682       | 0.680        | 0.649       | 0.713          | NA                 | NA                 | 0.704 <sup>4</sup> | 0.703            | 0.729             | NA                 | NA                 |
| <i>GLIS3</i>        | rs7034200  | A                                      | 0.485             | 0.494      | 0.490      | 0.487       | 0.465        | 0.489       | 0.485          | NA                 | 0.466              | 0.570              | 0.486            | 0.506             | 0.522              | 0.518              |
| <i>ADRA2A</i>       | rs10885122 | G                                      | 0.888             | 0.896      | 0.891      | 0.881       | 0.899        | 0.890       | 0.888          | NA                 | 0.879              | 0.885              | 0.888            | 0.874             | 0.875              | 0.884              |
| <i>TCF7L2</i>       | rs4506565  | T                                      | 0.315             | 0.310      | 0.328      | 0.310       | 0.311        | 0.306       | 0.314          | 0.260 <sup>5</sup> | 0.262 <sup>5</sup> | 0.205 <sup>5</sup> | 0.291            | 0.362             | NA                 | NA                 |
| <i>CRY2</i>         | rs11605924 | A                                      | 0.465             | 0.446      | 0.461      | 0.470       | 0.469        | 0.500       | 0.519          | NA                 | 0.493              | 0.504              | 0.482            | 0.464             | 0.449              | 0.415              |
| <i>MADD</i>         | rs7944584  | A                                      | 0.716             | 0.723      | 0.703      | 0.729       | 0.716        | 0.755       | 0.729          | NA                 | 0.758              | 0.757              | 0.709            | 0.634             | 0.700              | 0.642              |
| <i>FADS1</i>        | rs174550   | T                                      | 0.677             | 0.677      | 0.673      | 0.667       | 0.674        | 0.603       | 0.676          | 0.690 <sup>7</sup> | 0.646              | 0.659              | 0.665            | 0.720             | 0.707              | 0.729              |
| <i>MTNR1B</i>       | rs10830963 | G                                      | 0.278             | 0.290      | 0.279      | 0.277       | 0.292        | 0.260       | 0.285          | NA                 | 0.256              | 0.280              | 0.253            | 0.235             | 0.283              | 0.264              |
| <i>C2CD4B</i>       | rs11071657 | A                                      | 0.642             | 0.630      | 0.635      | 0.626       | 0.611        | 0.590       | 0.634          | NA                 | 0.657              | 0.598              | 0.637            | 0.642             | 0.666 <sup>3</sup> | 0.683 <sup>3</sup> |
| <i>IGF1</i>         | rs35767    | G                                      | 0.829             | 0.853      | 0.844      | 0.848       | 0.837        | 0.866       | 0.855          | NA                 | 0.849              | 0.850              | 0.842            | 0.819             | 0.803              | 0.772              |

<sup>1</sup>Risk-raising allele = allele positively associated with elevated fasting glucose or fasting insulin in MAGIC consortia (32)

<sup>2</sup>Proxy SNP used: *rs11717195*

<sup>3</sup>Proxy SNP used: *rs12440695*

<sup>4</sup>Proxy SNP used: *rs13266634*

<sup>5</sup>Proxy SNP used: *rs7903146*

<sup>6</sup>Proxy SNP used: *rs17998846*

<sup>7</sup>Proxy SNP used: *rs174548*

Table S5. Methods: fasting glucose and insulin quantification and assessment other relevant participant characteristics<sup>1</sup>

| COHORT            | Fasting glucose quantification <sup>1</sup>                                                                                                                                                                                                                                           | Fasting insulin quantification <sup>1</sup>                                                                                                                                                                                                                                                                              | Assessment of other relevant participant characteristics <sup>2</sup>                                                                                                                                                                                                                                                                                                                                                                                                                                                                                                                                                                                                                                                                                                                                                                                                                          |
|-------------------|---------------------------------------------------------------------------------------------------------------------------------------------------------------------------------------------------------------------------------------------------------------------------------------|--------------------------------------------------------------------------------------------------------------------------------------------------------------------------------------------------------------------------------------------------------------------------------------------------------------------------|------------------------------------------------------------------------------------------------------------------------------------------------------------------------------------------------------------------------------------------------------------------------------------------------------------------------------------------------------------------------------------------------------------------------------------------------------------------------------------------------------------------------------------------------------------------------------------------------------------------------------------------------------------------------------------------------------------------------------------------------------------------------------------------------------------------------------------------------------------------------------------------------|
| <b>Health ABC</b> | ≥8-hour fasting plasma glucose was measured by an automated glucose oxidase reaction (YSI 2300, Yellow Springs, OH).                                                                                                                                                                  | ≥8-hour fasting plasma insulin was assayed with a microparticle enzyme immunoassay (Abbott IMx).                                                                                                                                                                                                                         | Demographic and socioeconomic characteristics were ascertained by questionnaire at baseline. BMI was calculated using measured weight (kg, year 2 visit when FFQ data ascertained) and height (m <sup>2</sup> , at baseline).<br><u>Physical Activity</u> : Categorized into minutes of walking per week: (0 mins, >0 and <150 mins/wk, ≥150 mins/wk)<br><u>Field Center</u> : 2 centers<br><u>Level of Education</u> : Categorized in 3 groups: <high school degree, high school degree, postsecondary degree<br><u>Smoking</u> : Classified as current, former, and never smoking.<br><u>Alcohol</u> : Categorized into 4 groups: none in past year, <1 drink/week, 1-7 drinks/week, >1 drink/day                                                                                                                                                                                            |
| <b>CHS</b>        | ≥8-hour fasting glucose was measured using a Kodak Ektachem 700 analyzer with reagents (Eastman Kodak, Rochester, NY). The overall CV was 1.86%, and the correlation coefficient between 169 pairs of blind replicates was 0.997.                                                     | ≥8-hour fasting insulin. Fasting insulin was measured by radioimmunoassay (Coat-A-Count Insulin assay (Diagnostics Products Corp, Los Angeles, CA)                                                                                                                                                                       | Participants completed standard questionnaires on medical history, health status, and personal habits and underwent a clinic examination Body mass index (BMI) was calculated from measured weight (kg)/height (m) <sup>2</sup> .<br><u>Physical Activity</u> : Derived from a questionnaire and exercise intensity was classified into 3 categories ( none, low/moderate, high)<br><u>Field Center</u> : 4 centers<br><u>Level of Education</u> : Categorized in 3 groups: (1) no high school degree, (2) high school or vocational school degree, (3) college degree<br><u>Smoking</u> : classified as current, former, and never smoking.<br><u>Alcohol</u> : Calculated as drinks per week                                                                                                                                                                                                 |
| <b>FHS</b>        | ≥8-hour fasting plasma glucose was measured with a hexokinase reagent kit (A-agent glucose test, Abbott, South Pasadena, California). Glucose assays were run in duplicate, and the intra-assay coefficient of variation ranged from 2% to 3%, depending on the assayed glucose level | ≥8-hour fasting insulin concentrations were measured in EDTA plasma as total immunoreactive insulin (Coat-A-Count insulin; Diagnostic Products, Los Angeles, CA) at exam 5 in the Framingham Offspring Cohort and with a human-specific insulin assay (Linco Inc, St Louis, MO) in the Framingham Generation III cohort. | Demographic and socioeconomic characteristics were ascertained at the baseline examination by a trained interviewer. Height (to the nearest 0.25 inch) and weight (to the nearest 0.25 lb) were measured with the subject standing, with shoes off, wearing only a hospital gown. Body mass index (BMI) was calculated from measured weight (kg)/height(m) <sup>2</sup> .<br><u>Physical Activity</u> : PAL was assessed as a weighted average of the proportion of a typical day spent sleeping and performing sedentary, slight, moderate, or heavy physical activities (expressed in metabolic equivalents) (33).<br><u>Family Structure</u> : Unique to Framingham<br><u>Level of Education</u> : Continuous, ranging from 0 to 30 years of education.<br><u>Smoking</u> : Classified as cigarettes smoked regularly in last year (yes/no)<br><u>Alcohol</u> : Calculated as grams per day |
| <b>ARIC</b>       | ≥8-hour fasting blood samples were drawn from an antecubital vein into tubes containing a serum separator gel. Serum glucose levels were assessed with a hexokinase/glucose-6-phosphate dehydrogenase method.                                                                         | ≥8-hour fasting insulin was measured by radioimmunoassay ( <sup>125</sup> I insulin kit; Cambridge Medical Diagnosis, Bilerica, MA), with a 7 pmol/l lower limit of sensitivity and 33% cross-reactivity with proinsulin (34)                                                                                            | Demographic and socioeconomic characteristics were ascertained at the baseline examination by a trained interviewer. Height (to the nearest 1 cm) and weight (to the nearest 0.50 lb) were measured with the subject standing, with shoes off, wearing light-weight, non-restrictive underwear. Body mass index (BMI) was calculated from measured weight (kg)/height(m) <sup>2</sup> .<br><u>Physical Activity</u> : Assessed as both sport and leisure time using the Baecke questionnaire (35). A sports activity score and a leisure activity score ranged from low to high (five quintile categories)                                                                                                                                                                                                                                                                                     |

|                |                                                                                                                                                                                                                                                                                                                                                                                                             |                                                                                                                                                                                                                                                                                    |                                                                                                                                                                                                                                                                                                                                                                                                                                                                                                                                                                                                                                                                                                                                                          |
|----------------|-------------------------------------------------------------------------------------------------------------------------------------------------------------------------------------------------------------------------------------------------------------------------------------------------------------------------------------------------------------------------------------------------------------|------------------------------------------------------------------------------------------------------------------------------------------------------------------------------------------------------------------------------------------------------------------------------------|----------------------------------------------------------------------------------------------------------------------------------------------------------------------------------------------------------------------------------------------------------------------------------------------------------------------------------------------------------------------------------------------------------------------------------------------------------------------------------------------------------------------------------------------------------------------------------------------------------------------------------------------------------------------------------------------------------------------------------------------------------|
|                |                                                                                                                                                                                                                                                                                                                                                                                                             |                                                                                                                                                                                                                                                                                    | <p><u>Field Center:</u> 4 centers</p> <p><u>Level of Education:</u> Categorized in the following 6 groups: (grade school or none, some high school, high school graduate, vocational school, college, graduate/professional school).</p> <p><u>Smoking:</u> Current/ former/ never/ missing or unknown</p> <p><u>Alcohol:</u> Calculated as grams per day</p>                                                                                                                                                                                                                                                                                                                                                                                            |
| <b>FamHS</b>   | <p>≥8-hour fasting blood samples were collected, allowed to clot, centrifuged, aliquoted, and frozen at -70 degrees Celsius before shipment to a central processing laboratory. At the central processing laboratory, glucose was measured by a thin film adaptation of a glucose oxidase enzymatic, spectrophotometric procedure using the Vitros analyzer (Ortho Clinical Diagnostics, Rochester, NY)</p> | <p>≥8-hour fasting insulin was measured using the coated-tube radioimmunoassay method distributed by Diagnostic Products Corp. (Los Angeles, CA)</p>                                                                                                                               | <p>Demographic and socioeconomic characteristics were ascertained at baseline by questionnaire. Body mass index (BMI) was calculated from measured weight (kg)/height(m)<sup>2</sup>.</p> <p><u>Physical Activity:</u> Expressed as minutes per day spent exercising</p> <p><u>Level of Education:</u> Categorized in 3 groups (high school graduate or less, vocational school, college or more)</p> <p><u>Field Center:</u> 4 centers and family structure unique to study.</p> <p><u>Smoking:</u> Classified as current, former, never, missing or unknown.</p> <p><u>Alcohol:</u> Expressed as drinks per week and expressed as non-drinkers, 1-3 drinks, 4-7 drinks, 8-14 drinks, ≥14 drinks</p>                                                    |
| <b>AGES</b>    | <p>≥8-hour fasting blood samples were collected from participants. Glucose was measured on a Hitachi 912 using reagents from Roche Diagnostics following manufacturer's instructions.</p>                                                                                                                                                                                                                   | <p>Insulin was measured in serum by electrochemiluminescence immunoassay on the Roche Elecsys 1010/2010 analyzer.</p>                                                                                                                                                              | <p>Demographic and socioeconomic characteristics were ascertained from self-report through an interviewer-administered questionnaire. BMI was calculated from clinical measurements for height and weight.</p> <p><u>Physical Activity:</u> Assessed by questionnaire and participants self-reported how often they participated in moderate or vigorous physical activities in current life. Five categories of physical activity: never, rarely, occasionally, moderately often or frequently.</p> <p><u>Level of Education:</u> Categorized in 4 groups - primary school, secondary school, college, and university.</p> <p><u>Smoking:</u> Current smokers and not-current smokers (yes/no).</p> <p><u>Alcohol:</u> Calculated as grams per week</p> |
| <b>Fenland</b> | <p>≥8-hour fasting plasma glucose was measured with a hexokinase kit (Siemens Healthcare). The assay is automated on the Dimension RxL Analyser (Siemens Healthcare). The absorbance due to NADH is determined using a bichromatic endpoint technique.</p>                                                                                                                                                  | <p>For serum insulin, samples are assayed in singleton on a 1235 AutoDELFIA automatic immunoassay system using a two-step time resolved fluorometric assay (Kit No. B080-101). All reagents, standards and consumables are those recommended and supplied by the manufacturer.</p> | <p>Demographic and socioeconomic characteristics were ascertained??</p> <p>Body mass index (BMI) was calculated from measured weight (kg)/height(m)<sup>2</sup>.</p> <p><u>Physical Activity:</u> Not available</p> <p><u>Level of Education:</u> Not available</p> <p><u>Smoking:</u> Current/ former/ never/ missing or unknown</p> <p><u>Alcohol:</u> Current / former/ never drinker/ missing or unknown</p>                                                                                                                                                                                                                                                                                                                                         |
| <b>Malmö</b>   | <p>Glucose was measured in overnight fasting whole blood samples by a hexokinase-glucose-6-phosphate dehydrogenase method. Blood glucose was converted to plasma glucose using a correction factor of 1.13.</p>                                                                                                                                                                                             | <p>Insulin was measured by non-specific radioimmunoassay in overnight fasting blood samples.</p>                                                                                                                                                                                   | <p>Demographic and socioeconomic characteristics were ascertained from an extensive questionnaire. BMI was calculated from measured weight (kg)/height(m)<sup>2</sup>.</p> <p><u>Physical Activity:</u> Leisure-time physical activity was obtained from a list of 18 different activities. The duration of each activity was multiplied by an intensity factor creating a score. The score was divided into quartiles.</p> <p><u>Level of Education:</u> Categorized in 6 groups: elementary; primary and secondary; upper secondary; further education without a degree; university degree; unknown</p> <p><u>Smoking:</u> Classified as current, former, never smoking, or missing/unknown</p>                                                        |

|                  |                                                                                                                                                                                                                                            |                                                                                                                                                                                                                                      |                                                                                                                                                                                                                                                                                                                                                                                                                                                                                                                                                                                                                                                                                                                                                                                                                     |
|------------------|--------------------------------------------------------------------------------------------------------------------------------------------------------------------------------------------------------------------------------------------|--------------------------------------------------------------------------------------------------------------------------------------------------------------------------------------------------------------------------------------|---------------------------------------------------------------------------------------------------------------------------------------------------------------------------------------------------------------------------------------------------------------------------------------------------------------------------------------------------------------------------------------------------------------------------------------------------------------------------------------------------------------------------------------------------------------------------------------------------------------------------------------------------------------------------------------------------------------------------------------------------------------------------------------------------------------------|
|                  |                                                                                                                                                                                                                                            |                                                                                                                                                                                                                                      | <u>Alcohol</u> : Non consumers (no alcohol in the 7-day food diary + no alcohol consumption during the previous year in the questionnaire). Other participants were divided into gender-specific quintiles according to their reported intake in the 7-day diary.                                                                                                                                                                                                                                                                                                                                                                                                                                                                                                                                                   |
| <b>ULSAM</b>     | ≥8-hour fasting venous plasma samples were obtained from the antecubital vein. Glucose was measured by the glucose dehydrogenase method (Gluc-DH, Merck, Darmstadt, Germany). The intra-individual CV for fasting plasma glucose was 3.2%. | Plasma insulin was assayed using an enzymatic-immunological assay (Enzymmun, Boehringer Mannheim, Germany) performed in an ES300 automatic analyser (Boehringer Mannheim) and the levels were originally given in mU/l.              | Demographic and socioeconomic characteristics were ascertained at baseline from an extensive interviewer-administered questionnaire. Height was measured to the nearest whole cm, and body weight to the nearest 0.1 kg. BMI was calculated from measured weight (kg)/height(m) <sup>2</sup> .<br><u>Physical Activity</u> : Leisure time physical activity was assessed using a questionnaire and participants were classified into four categories are referred to as sedentary, moderate, regular and athletic physical activity (36).<br><u>Level of Education</u> : Categorized in 3 groups, elementary school only, secondary school only, college or graduate degree.<br><u>Smoking</u> : Classified as current (yes/no)<br><u>Alcohol</u> : Calculated as grams per day                                     |
| <b>GLACIER</b>   | Plasma glucose was assayed using fresh capillary plasma on a benchtop analyser (Reflotron; Boehringer Mannheim, Mannheim, Germany). A threshold glucose value of ≤1 mmol/l was used to exclude potentially spurious values.                | Serum insulin was measured on a Roche Modular E170 analyzer, (Roche, Mannheim, Germany) with limits of detection of 2.6-24.9 mIU/L.                                                                                                  | Demographic and socioeconomic characteristics were ascertained by the Umeå EPIC lifestyle questionnaire<br><u>BMI</u> : Height and weight were measured using a calibrated wall-mounted stadiometer and scales, respectively. BMI was calculated as weight in kg/(height in m) <sup>2</sup> .<br><u>Physical Activity</u> : Based on questionnaire response and classified into 5 exercise frequency categories (Never, Infrequently, 1-2 times per week, 2-3 times per week, >3times per week)<br><u>Level of Education</u> : Categorized into 3 groups- total of 6-7 years of compulsory school education; total 12-13 years of education (school + college); school + college + university<br><u>Smoking</u> : Classified as current, former, and never smoking.<br><u>Alcohol</u> : Calculated as grams per day |
| <b>Rotterdam</b> | ≥8-hour fasting blood glucose was measured enzymatically using the Hexokinase method (Boehringer Mannheim).                                                                                                                                | Fasting blood samples were drawn by venipuncture. Samples were stored at -80 °C. In 2008 insulin levels were measured on a Modular Analytics E170 analyzer, using a Cobas Roche electrochemiluminescence immunoassay (12017547 122). | Demographic and socioeconomic characteristics were ascertained at the baseline examination by a trained interviewer. Height and weight were measured while the participants were wearing indoor clothing and no shoes. Body mass index was expressed in kilograms per square meter.<br><u>Physical Activity</u> : Expressed as kcal expended per day<br><u>Level of Education</u> : Categorized in 4 groups: completed primary education, lower vocational training or general education, intermediate vocational training or intermediate and higher general education, and higher vocational training, college, or university.<br><u>Smoking</u> : Classified as current, former, and never smoking.<br><u>Alcohol</u> : Calculated as grams per day                                                              |

|                  |                                                                                                                                                                                                                                                                                                                                         |                                                                                                                                                                                                      |                                                                                                                                                                                                                                                                                                                                                                                                                                                                                                                                                                                                                                                                                                                                                                                                                                                                                                                                                                                                                    |
|------------------|-----------------------------------------------------------------------------------------------------------------------------------------------------------------------------------------------------------------------------------------------------------------------------------------------------------------------------------------|------------------------------------------------------------------------------------------------------------------------------------------------------------------------------------------------------|--------------------------------------------------------------------------------------------------------------------------------------------------------------------------------------------------------------------------------------------------------------------------------------------------------------------------------------------------------------------------------------------------------------------------------------------------------------------------------------------------------------------------------------------------------------------------------------------------------------------------------------------------------------------------------------------------------------------------------------------------------------------------------------------------------------------------------------------------------------------------------------------------------------------------------------------------------------------------------------------------------------------|
| <b>InCHIANTI</b> | ≥8-hour fasting blood glucose was determined by an enzymatic colorimetric assay using a modified glucose oxidase-peroxidase method (Roche Diagnostics GmbH, Mannheim, Germany) and a Roche-Hitachi 917 analyzer.                                                                                                                        | Plasma fasting insulin level was determined with a double-antibody, solid-phase radioimmunoassay (intra-assay CV=3.1±0.3%; Sorin Biomedica, Milan, Italy).                                           | Demographic and socioeconomic characteristics were obtained during a structured interview. BMI was calculated from measured weight (kg)/height(m) <sup>2</sup> .<br><u>Physical Activity</u> : The level of physical activity in the 12 months prior the interview was assessed through an modified standard interview-administered questionnaire. Based on the response of 7 questions, PA was collapsed into 3 categories: 1) sedentary (inactivity or light-intensity activity <1 h per week), 2) light physical activity (light intensity activity 2–4 h per week), and 3) moderate-high physical activity (light-intensity activity at least 5 h per week or moderate activity at least 1–2 h per week)<br><u>Level of Education</u> : Categorized in 3 groups: 1) elementary, secondary, or undocumented, 2) high school or professional school degree, 3) university degree or higher<br><u>Smoking</u> : Classified as current, former, and never smoking.<br><u>Alcohol</u> : Calculated as grams per day |
| <b>GENDAI</b>    | ≥8-hour fasting blood samples were drawn from an antecubital vein into tubes containing a serum separator gel. Serum glucose levels were assessed using commercially available enzymatic colorimetric assays (Sigma Diagnostics, St. Louis, MO, USA) on an automated ACE analyzer (Schiapparelli Biosystems, Inc., Fairfield, NJ, USA). | Serum insulin was measured via immunofluorescence on an automatic AIA 600II analyzer (Tosoh Corp., Tokyo, Japan) using a commercially available kit for this purpose (ST AIA-PACK IRI, Tosoh Corp.). | Demographic and socioeconomic characteristics were ascertained via an interviewer-administered questionnaire. BMI was calculated from measured weight (kg)/height(m) <sup>2</sup> .<br><u>Physical Activity</u> : Determined from the Sallis physical activity recall checklist and expressed as minutes of physical activity per day<br><u>Level of Education</u> : Not applicable, all were in 5 <sup>th</sup> or 6 <sup>th</sup> grade of school                                                                                                                                                                                                                                                                                                                                                                                                                                                                                                                                                                |
| <b>GHRAS</b>     | ≥8-hour fasting blood samples were drawn from an antecubital vein into tubes containing a serum separator gel. Serum glucose levels were assessed using commercially available enzymatic colorimetric assays (Sigma Diagnostics, St. Louis, MO, USA) on an automated ACE analyzer (Schiapparelli Biosystems, Inc., Fairfield, NJ, USA). | Serum insulin was measured via immunofluorescence on an automatic AIA 600II analyzer (Tosoh Corp., Tokyo, Japan) using a commercially available kit for this purpose (ST AIA-PACK IRI, Tosoh Corp.). | Demographic and socioeconomic characteristics were ascertained via an interviewer-administered questionnaire. BMI was calculated from measured weight (kg)/height(m) <sup>2</sup> .<br><u>Physical Activity</u> : Expressed as MET/day<br><u>Level of Education</u> : Categorized in 4 groups No degree, primary degree, secondary degree, higher degree<br><u>Smoking</u> : Classified as current, former, and never smoking<br><u>Alcohol</u> : Calculated as ml per day with a concentration of 12g ethanol/100 ml                                                                                                                                                                                                                                                                                                                                                                                                                                                                                              |

<sup>1</sup>Fasting insulin and fasting glucose were quantified from samples collected at the baseline examination (when dietary intake information was collected) in all cohorts, with the exception of Rotterdam, where fasting glucose and fasting insulin were quantified from samples collected approximately 6 years after the assessment of dietary intake.

<sup>2</sup> Table H presents the model covariate defined by cohort



Table S6. Model covariates defined by cohort

| Covariates                                                                 | Health ABC     | CHS <sup>1</sup>  | FHS              | ARIC             | FamHS            | AGES <sup>2</sup> | Fenland       | Malmö            | ULSAM            | GLACIER | Rotterdam | InCHIANTI         | GENDAI        | GHRAS         |
|----------------------------------------------------------------------------|----------------|-------------------|------------------|------------------|------------------|-------------------|---------------|------------------|------------------|---------|-----------|-------------------|---------------|---------------|
| <b>Model 1</b>                                                             |                |                   |                  |                  |                  |                   |               |                  |                  |         |           |                   |               |               |
| Energy intake (kcal/d)                                                     | ✓              | ✓                 | ✓                | ✓                | ✓                | NA                | ✓             | ✓                | ✓                | ✓       | ✓         | ✓                 | ✓             | ✓             |
| Age (years)                                                                | ✓              | ✓                 | ✓                | ✓                | ✓                | ✓                 | ✓             | ✓                | ✓                | ✓       | ✓         | ✓                 | ✓             | ✓             |
| Sex ( M/F)                                                                 | ✓              | ✓                 | ✓                | ✓                | ✓                | ✓                 | ✓             | ✓                | ✓                | ✓       | ✓         | ✓                 | ✓             | ✓             |
| Field center or population/family structure*                               | ✓              | ✓                 | ✓*               | ✓                | ✓*               | NA                | NA            | NA               | NA               | NA      | NA        | NA                | NA            | NA            |
| <b>Model 2</b>                                                             |                |                   |                  |                  |                  |                   |               |                  |                  |         |           |                   |               |               |
| Education <sup>3</sup>                                                     | ✓              | ✓                 | ✓                | ✓                | ✓                | ✓                 | NA            | ✓                | ✓                | ✓       | ✓         | ✓                 | NA            | ✓             |
| Smoking History <sup>3</sup> OR Current smoking (yes/no)                   | ✓              | ✓                 | ✓                | ✓                | ✓                | ✓                 | ✓             | ✓                | ✓                | ✓       | ✓         | ✓                 | NA            | ✓             |
| Physical activity (PA) <sup>3</sup>                                        | ✓              | ✓                 | ✓                | ✓                | ✓                | ✓                 | NA            | ✓                | ✓                | ✓       | ✓         | ✓                 | ✓             | ✓             |
| Alcohol (ethanol) intake <sup>3</sup>                                      | ✓              | ✓                 | ✓                | ✓                | ✓                | ✓                 | ✓             | ✓                | ✓                | ✓       | ✓         | ✓                 | NA            | ✓             |
| <b>Model 3</b>                                                             |                |                   |                  |                  |                  |                   |               |                  |                  |         |           |                   |               |               |
| <b>Fruit</b><br>Servings /day or/week*<br>OR                               | ✓*             | ✓ w/o fruit juice | ✓w/o fruit juice | ✓w/o fruit juice | ✓w/o fruit juice | ✓w/o fruit juice  |               |                  |                  |         |           |                   | ✓             | ✓             |
| g/day                                                                      |                |                   |                  |                  |                  |                   | ✓             | ✓w/o fruit juice | ✓w/o fruit juice | ✓       | ✓         | ✓ w/o fruit juice |               |               |
| <b>Vegetables</b><br>Servings /day or/week*<br>OR                          | ✓*             | ✓No French fries  | ✓w/o potatoes    | ✓w/o potatoes    | ✓w/o potatoes    | ✓w/o potatoes     |               |                  |                  |         |           |                   | ✓w/o potatoes | ✓w/o potatoes |
| g/day                                                                      |                |                   |                  |                  |                  |                   | ✓             | ✓                | ✓w/o potatoes    | ✓       | ✓         | ✓w/o potatoes     |               |               |
| <b>Nuts/ seeds</b><br>Servings /day or/week*<br>OR                         | ✓*             | ✓                 | ✓                | ✓                | ✓                | NA                |               | NA               |                  |         |           |                   | NA            | NA            |
| g/day                                                                      |                |                   |                  |                  |                  |                   | ✓             |                  | ✓                | ✓       | ✓         | ✓                 |               |               |
| <b>Fish</b><br>Servings/day or/week*<br>OR                                 | ✓* w/o seafood | ✓                 | ✓ w/o seafood    | ✓ w/o seafood    | ✓ w/o seafood    | ✓                 |               |                  |                  |         |           |                   | ✓             | ✓             |
| g / day                                                                    |                |                   |                  |                  |                  |                   | ✓ w/o seafood | ✓w/o seafood     | ✓w/o seafood     | ✓       | ✓         | ✓ w/o seafood     |               |               |
| <b>Coffee (caffeinated; unless otherwise specified)</b><br>Servings/day OR | ✓+Decaf        | ✓ + Decaff        | ✓                | ✓                | ✓                |                   |               |                  |                  |         |           |                   |               |               |
| g/day                                                                      |                |                   |                  |                  |                  |                   | ✓             | ✓                | ✓                | ✓       | ✓         | ✓                 |               |               |

|                                           |    |   |   |   |   |                                  |   |   |   |   |   |   |   |   |
|-------------------------------------------|----|---|---|---|---|----------------------------------|---|---|---|---|---|---|---|---|
| <b>Red or processed meat</b>              |    |   |   |   |   |                                  |   |   |   |   |   |   |   |   |
| <i>Servings/day or/week*</i><br><i>OR</i> | ✓* | ✓ | ✓ | ✓ | ✓ | <i>not included</i> <sup>2</sup> |   |   |   |   |   |   | ✓ | ✓ |
| <i>g/day</i>                              |    |   |   |   |   |                                  | ✓ | ✓ | ✓ | ✓ | ✓ | ✓ |   |   |
| <b>Model 4</b>                            |    |   |   |   |   |                                  |   |   |   |   |   |   |   |   |
| BMI (kg/m <sup>2</sup> ,) continuous      | ✓  | ✓ | ✓ | ✓ | ✓ | ✓                                | ✓ | ✓ | ✓ | ✓ | ✓ | ✓ | ✓ | ✓ |

<sup>1</sup>In CHS, all missing values were imputed.

<sup>2</sup>In AGES, dietary covariates were chosen empirically from the abbreviated list available dietary variables (significant correlation with whole grain intake,  $p < 0.001$ )

<sup>3</sup>For more details on covariates refer to Table S5

Table S7. Main effects ( $\beta \pm SE$ ) of daily whole grain servings on fasting glucose and fasting insulin across each of 14 cohorts

| Meta-Analyzed Estimate             | Health ABC      | CHS             | FHS             | ARIC            | FamHS           | AGES            | Fenland       | Malmö           | ULSAM             | GLACIER                 | Rotterdam       | InCHIANTI             | GENDAI          | GHRAS         |
|------------------------------------|-----------------|-----------------|-----------------|-----------------|-----------------|-----------------|---------------|-----------------|-------------------|-------------------------|-----------------|-----------------------|-----------------|---------------|
| <b>FASTING GLUCOSE</b><br>(mmol/L) | <i>n</i> =1,263 | <i>n</i> =2,765 | <i>n</i> =5,835 | <i>n</i> =7,201 | <i>n</i> =2,094 | <i>n</i> =2,748 | <i>n</i> =720 | <i>n</i> =4,924 | <i>n</i> =880-942 | <i>n</i> =13,242-14,913 | <i>n</i> =2,304 | <i>n</i> =1,009-1,071 | <i>n</i> =1,087 | <i>n</i> =856 |
| Model 1                            | -0.079±0.02*    | -0.046±0.02*    | -0.031±0.005*   | -0.017±0.005*   | -0.020±0.007*   | -0.073±0.01*    | -0.010±0.01   | -0.012±0.004*   | -0.023±0.02       | -0.013±0.004*           | -0.013±0.007    | -0.029±0.03           | -0.016±0.02     | 0.015±0.02    |
| Model 2                            | -0.076±0.02*    | -0.028±0.02     | -0.024±0.006*   | -0.010±0.005*   | -0.013±0.007    | -0.074±0.01*    | -0.010±0.01   | -0.009±0.004*   | -0.029±0.02       | -0.009±0.004*           | -0.009±0.007    | -0.025±0.03           | -0.017±0.02     | 0.017±0.02    |
| Model 3                            | -0.058±0.02*    | -0.023±0.02     | -0.017±0.006*   | -0.011±0.005*   | -0.006±0.007    | -0.073±0.01*    | -0.01±0.01    | -0.005±0.004    | -0.030±0.02       | -0.013±0.004*           | -0.003±0.008    | -0.024±0.03           | -0.018±0.02     | 0.017±0.02    |
| Model 4                            | -0.042±0.02     | -0.018±0.02     | -0.012±0.006*   | -0.009±0.005    | -0.005±0.007    | -0.054±0.01*    | -0.004±0.01   | -0.004±0.004    | -0.021±0.02       | -0.011±0.004*           | -0.0004±0.007   | -0.028±0.03           | -0.020±0.02     | 0.017±0.02    |
| <b>FASTING INSULIN</b><br>(pmol/L) | <i>n</i> =1,249 | <i>n</i> =2,753 | <i>n</i> =5,835 | <i>n</i> =7,201 | <i>n</i> =2,089 | <i>n</i> =2,748 | <i>n</i> =720 | <i>n</i> =4,765 | <i>n</i> =872-932 | <i>n</i> =748-891       | <i>n</i> =2,240 | <i>n</i> =983-1,044   | <i>n</i> =1,064 | <i>n</i> =670 |
| Model 1                            | -0.095±0.02*    | -0.032±0.01*    | -0.016±0.005*   | -0.034±0.006*   | -0.025±0.008*   | -0.084±0.02*    | -0.063±0.02*  | -0.009±0.004*   | -0.038±0.02*      | -0.033±0.02             | -0.020±0.007*   | 0.024±0.02            | 0.035±0.02      | -0.025±0.02   |
| Model 2                            | -0.093±0.02*    | -0.034±0.01*    | -0.016±0.006*   | -0.032±0.006*   | -0.025±0.008*   | -0.082±0.02*    | -0.062±0.02*  | -0.010±0.004*   | -0.036±0.02*      | -0.031±0.02             | -0.022±0.007*   | 0.027±0.02            | 0.036±0.02      | -0.027±0.02   |
| Model 3                            | -0.071±0.02*    | -0.023±0.01     | -0.007±0.006    | -0.026±0.007*   | -0.022±0.008*   | -0.077±0.02*    | -0.051±0.02*  | -0.007±0.004    | -0.034±0.02*      | -0.028±0.02             | -0.017±0.008*   | 0.027±0.02            | 0.041±0.02      | -0.028±0.02   |
| Model 4                            | -0.046±0.02*    | -0.017±0.01     | 0.001±0.005     | -0.022±0.006*   | -0.022±0.007*   | -0.031±0.01*    | -0.030±0.02*  | -0.005±0.004    | -0.019±0.02       | -0.015±0.02             | -0.013±0.007*   | 0.028±0.02            | 0.017±0.02      | -0.027±0.02   |

<sup>1</sup>All such values, adjusted for model 1 covariates: sex, age (y), energy intake (kcal/day), [field center in ARIC, CHS, FamHS, Health ABC, InCHIANTI; Principal components were used to adjust for population substructure in FHS and FamHS]

<sup>2</sup>All such values, adjusted for model 2 covariates: above, plus categories of cohort-specific education level metric, categories of cohort-specific physical activity level metric, smoking status (current, former, never), alcohol intake (grams/day)

<sup>3</sup>All such values, adjusted for model 3 covariates: above, plus cohort-defined dietary confounders, including fruit, vegetables, red or processed meats, fish, nuts/seeds, and coffee.

<sup>4</sup>All such values, adjusted for model 4 covariates: above, plus body mass index (kg/m<sup>2</sup>)

\**p* < 0.05

Table S8. Interactions between whole grain intake and select SNP genotypes for fasting glucose and fasting insulin across each of 14 cohorts (interaction term  $\beta$  (SE))

| <i>Glucose-related SNP</i> | Health ABC       | CHS               | FHS               | ARIC              | FamHS            | AGES             | Fenland           | Malmö            | ULSAM            | GLACIER           | Rotterdam         | InCHIANTI         | GENDAI            | GHRAS             |
|----------------------------|------------------|-------------------|-------------------|-------------------|------------------|------------------|-------------------|------------------|------------------|-------------------|-------------------|-------------------|-------------------|-------------------|
|                            | $\beta$ (SE)     | $\beta$ (SE)      | $\beta$ (SE)      | $\beta$ (SE)      | $\beta$ (SE)     | $\beta$ (SE)     | $\beta$ (SE)      | $\beta$ (SE)     | $\beta$ (SE)     | $\beta$ (SE)      | $\beta$ (SE)      | $\beta$ (SE)      | $\beta$ (SE)      | $\beta$ (SE)      |
| rs340874                   | 0.009<br>(0.03)  | 0.017<br>(0.02)   | -0.009<br>(0.01)  | -0.004<br>(0.01)  | -0.011<br>(0.01) | 0.020<br>(0.02)  | 0.002<br>(0.02)   | NA               | -0.013<br>(0.02) | 0.004 (0.01)      | <0.001<br>(0.01)  | -0.020<br>(0.03)  | 0.020<br>(0.03)   | -0.016<br>(0.03)  |
| rs780094                   | -0.021<br>(0.03) | 0.018<br>(0.02)   | 0.005<br>(0.01)   | -0.005<br>(0.01)  | 0.015<br>(0.01)  | -0.018<br>(0.02) | -0.009<br>(0.02)  | 0.004<br>(0.01)  | 0.011<br>(0.02)  | 0.007<br>(0.01)   | 0.003<br>(0.01)   | 0.014<br>(0.04)   | 0.005<br>(0.03)   | 0.040<br>(0.02)   |
| rs560887                   | -0.045<br>(0.04) | -0.002<br>(0.02)  | -0.005<br>(0.01)  | 0.006<br>(0.01)   | 0.010<br>(0.01)  | -0.026<br>(0.02) | 0.014<br>(0.02)   | NA               | 0.010<br>(0.02)  | -0.002<br>(0.002) | -0.009<br>(0.01)  | 0.054<br>(0.04)   | 0.005<br>(0.03)   | 0.026<br>(0.03)   |
| rs11708067                 | 0.010<br>(0.04)  | 0.002<br>(0.03)   | -0.010<br>(0.01)  | 0.013<br>(0.01)   | -0.022<br>(0.01) | 0.023<br>(0.02)  | -0.005<br>(0.02)  | NA               | 0.012<br>(0.03)  | 0.009<br>(0.01)   | 0.014<br>(0.01)   | -0.058<br>(0.06)  | -0.082<br>(0.04)* | 0.017<br>(0.03)   |
| rs11920090                 | 0.034<br>(0.04)  | -0.019<br>(0.03)  | 0.009<br>(0.01)   | 0.003<br>(0.01)   | 0.006<br>(0.01)  | 0.030<br>(0.03)  | 0.004<br>(0.03)   | NA               | -0.004<br>(0.03) | -0.0003<br>(0.01) | -0.025<br>(0.01)+ | 0.006<br>(0.06)   | -0.061<br>(0.04)+ | 0.032<br>(0.03)   |
| rs2191349                  | -0.009<br>(0.03) | -0.041<br>(0.02)+ | -0.012<br>(0.01)+ | -0.002<br>(0.01)  | -0.013<br>(0.01) | 0.013<br>(0.02)  | 0.081 (0.02)      | NA               | -0.006<br>(0.02) | -0.003<br>(0.01)  | 0.006<br>(0.01)   | -0.013<br>(0.04)  | -0.015<br>(0.03)  | 0.002<br>(0.03)   |
| rs4607517                  | 0.024<br>(0.04)  | 0.016<br>(0.03)   | 0.006<br>(0.01)   | 0.004<br>(0.01)   | -0.017<br>(0.01) | 0.031<br>(0.03)  | 0.013<br>(0.03)   | -0.004<br>(0.01) | 0.023<br>(0.03)  | -0.010<br>(0.01)  | 0.014<br>(0.01)   | -0.051<br>(0.05)  | 0.003<br>(0.04)   | 0.024<br>(0.03)   |
| rs11558471                 | -0.025<br>(0.04) | 0.007<br>(0.02)   | -0.027<br>(0.01)+ | 0.002<br>(0.01)   | 0.006<br>(0.01)  | -0.010<br>(0.02) | -0.018<br>(0.03)  | NA               | NA               | -0.001<br>(0.01)  | 0.005<br>(0.01)   | 0.047<br>(0.05)   | NA                | NA                |
| rs7034200                  | 0.013<br>(0.03)  | 0.001<br>(0.02)   | 0.002<br>(0.01)   | 0.005<br>(0.01)   | -0.004<br>(0.01) | 0.014<br>(0.02)  | -0.011<br>(0.02)  | NA               | 0.025<br>(0.02)  | -0.002<br>(0.01)  | 0.014<br>(0.01)   | -0.001<br>(0.04)  | -0.035<br>(0.03)  | -0.023<br>(0.02)  |
| rs10885122                 | -0.044<br>(0.06) | -0.030<br>(0.04)  | 0.001<br>(0.01)   | 0.009<br>(0.01)   | -0.022<br>(0.02) | -0.008<br>(0.03) | 0.023<br>(0.01)   | NA               | -0.017<br>(0.03) | 0.014<br>(0.01)   | 0.013<br>(0.02)   | 0.005<br>(0.06)   | 0.018<br>(0.04)   | 0.036<br>(0.03)   |
| rs4506565                  | -0.022<br>(0.04) | -0.036<br>(0.02)  | -0.008<br>(0.01)  | 0.003<br>(0.01)   | 0.008<br>(0.01)  | 0.008<br>(0.02)  | -0.062<br>(0.02)* | <0.000<br>(0.01) | -0.028<br>(0.03) | 0.002<br>(0.01)   | 0.026<br>(0.01)*  | -0.041<br>(0.05)  | NA                | NA                |
| rs11605924                 | -0.029<br>(0.03) | 0.014<br>(0.02)   | <0.001<br>(0.01)  | -0.004<br>(0.01)  | <0.001<br>(0.01) | -0.001<br>(0.02) | 0.015<br>(0.02)   | NA               | -0.011<br>(0.02) | 0.009<br>(0.01)   | -0.003<br>(0.01)  | -0.073<br>(0.04)+ | 0.059<br>(0.03)*  | 0.007<br>(0.02)   |
| rs7944584                  | -0.004<br>(0.04) | 0.017<br>(0.03)   | 0.009<br>(0.01)   | 0.008<br>(0.01)   | 0.003<br>(0.01)  | -0.011<br>(0.02) | 0.009<br>(0.02)   | NA               | 0.004<br>(0.03)  | 0.004<br>(0.01)   | -0.002<br>(0.01)  | -0.071<br>(0.04)+ | 0.027<br>(0.03)   | 0.016<br>(0.03)   |
| rs174550                   | -0.001<br>(0.03) | -0.011<br>(0.02)  | -0.004<br>(0.01)  | -0.012<br>(0.01)+ | -0.003<br>(0.01) | -0.004<br>(0.02) | 0.035<br>(0.02)+  | -0.010<br>(0.01) | 0.032<br>(0.02)  | 0.009<br>(0.01)   | -0.013<br>(0.01)  | 0.046<br>(0.04)   | -0.022<br>(0.03)  | -0.047<br>(0.03)+ |
| rs10830963                 | -0.034<br>(0.04) | 0.039<br>(0.03)   | -0.001<br>(0.01)  | 0.010<br>(0.01)   | -0.001<br>(0.01) | -0.014<br>(0.02) | 0.067<br>(0.03)*  | NA               | -0.040<br>(0.03) | 0.002<br>(0.01)   | 0.007<br>(0.01)   | -0.073<br>(0.05)  | 0.024<br>(0.03)   | -0.045<br>(0.03)  |
| rs11071657                 | -0.025<br>(0.03) | 0.024<br>(0.02)   | 0.002<br>(0.01)   | 0.003<br>(0.01)   | 0.009<br>(0.01)  | 0.018<br>(0.02)  | 0.017<br>(0.02)   | NA               | -0.020<br>(0.02) | 0.004<br>(0.01)   | -0.013<br>(0.01)  | 0.046<br>(0.05)   | 0.016<br>(0.03)   | 0.028<br>(0.03)   |
| <i>Insulin-related SNP</i> |                  |                   |                   |                   |                  |                  |                   |                  |                  |                   |                   |                   |                   |                   |
| rs780094                   | 0.026<br>(0.03)  | -0.009<br>(0.02)  | 0.010<br>(0.01)   | -0.012<br>(0.01)  | 0.003<br>(0.01)  | -0.010<br>(0.02) | 0.003<br>(0.03)   | 0.017<br>(0.01)  | 0.023<br>(0.02)  | 0.021<br>(0.02)   | 0.012<br>(0.01)   | 0.035<br>(0.04)   | 0.045<br>(0.03)   | 0.030<br>(0.03)   |
| rs35767                    | -0.046<br>(0.04) | 0.013<br>(0.03)   | 0.001<br>(0.01)   | 0.002<br>(0.01)   | <0.001<br>(0.02) | 0.015<br>(0.03)  | 0.071<br>(0.04)*  | NA               | -0.021<br>(0.03) | -0.040<br>(0.03)  | 0.015<br>(0.01)   | 0.002<br>(0.04)   | -0.038<br>(0.04)  | 0.002<br>(0.03)   |

*meta-analyzed  $\beta$  (SE) for each interaction are published in main manuscript table*

*\* $p < 0.05$*

*†  $p < 0.10$*

**Figure S1.** Relationship between sample size and estimated statistical power for a range of interaction effect sizes.<sup>1</sup>

<sup>1</sup>Estimations are for an additive genetic model with a per-allele effect size of +0.02 interacting with a continuous environmental exposure with effect size of -0.02 (whole grain and allele effect size estimates selected from published studies (32, 37)). (a) estimated power for alpha 0.05; (b) alpha 0.01; (c) alpha 0.001; (d) alpha 0.0001. All power calculations were performed using Quanto version 1.2.3, 2007. Given these sample sizes, previously published reports of effect sizes for each whole grains and the SNPs of interest (32, 37), and our Bonferroni-corrected significance level, we had 80% power to detect interaction regression coefficients ranging from 0.015 to 0.02.

**Figure S2.** Mean daily servings of whole grain foods in 14 participating cohorts<sup>1</sup>

<sup>1</sup>Mean  $\pm$  SD whole grain foods (servings/day). Values are shown by region in order of ascending intake: North American cohorts = solid black diamonds; Northern European cohorts = solid gray diamonds; Mediterranean European cohorts = open diamonds. All cohorts used food frequency questionnaires; exceptions are starred (\*): AGES = specific foods survey; ULSAM = dietary records; GENDAI = 24-hour dietary recalls

**Figure S3.** Associations between daily whole grain intake and fasting glucose in 14 cohorts<sup>1</sup>

<sup>1</sup>Regression coefficient ( $\beta$  (95% CI)) representing expected change in fasting glucose (mmol/L) per 1-daily serving greater whole grain intake

- (a) Adjusted for model 2 covariates: sex, age (y), energy intake (kcal/day), [field center in ARIC, CHS, FamHS, Health ABC, InCHIANTI; population substructure by principal components in FHS and FamHS], education level, physical activity, alcohol intake, smoking status.
- Education level and physical activity were defined uniquely by cohort; smoking status was characterized as current, former, or never in 12 cohorts and as current or not current in 3 cohorts (FHS, AGES, ULSAM); education level, smoking status, and alcohol intake were not adjusted in the GENDAI cohort (5<sup>th</sup> and 6<sup>th</sup> graders).

(b) Adjusted for model 3 covariates: model 2 + red or processed meat, fish, vegetables, fruit, coffee, nuts & seeds

Most cohorts included each of dietary covariates listed in the table as servings per day or grams per day; exceptions are noted in Table S6.

(c) Adjusted for model 4 covariates: model 3 + BMI (kg/m<sup>2</sup>)

**Figure S4. Associations between daily whole grain intake and fasting insulin in 14 cohorts<sup>1</sup>**

<sup>1</sup>Regression coefficient ( $\beta$  (95% CI)) representing expected change in fasting insulin ((ln)pmol/L) per 1-daily serving greater whole grain intake

(a) Adjusted for model 2 covariates: sex, age (y), energy intake (kcal/day), [field center in ARIC, CHS, FamHS, Health ABC, InCHIANTI; population substructure by principal components in FHS and FamHS], education level, physical activity, alcohol intake, smoking status.

Education level and physical activity were defined uniquely by cohort; smoking status was characterized as current, former, or never in 12 cohorts and as current or not current in 3 cohorts (FHS, AGES, ULSAM); education level, smoking status, and alcohol intake were not adjusted in the GENDAI cohort (5<sup>th</sup> and 6<sup>th</sup> graders).

(b) Adjusted for model 3 covariates: model 2 + red or processed meat, fish, vegetables, fruit, coffee, nuts & seeds

Most cohorts included each of dietary covariates listed in the table as servings per day or grams per day; exceptions are noted in Table S6.

(c) Adjusted for model 4 covariates: model 3 + BMI (kg/m<sup>2</sup>)

**Figure S5. Interactions between daily whole grain intake and genotype for select SNPs for fasting glucose in 14 cohorts<sup>1</sup>**

<sup>1</sup>Regression coefficient for interaction between daily servings of whole grains\*SNP for fasting glucose (mmol/L), adjusted for age, sex, energy intake and field center (in Health ABC, ARIC, CHS, InCHIANTI) and population structure with principal components in FHS and Fam HS. Interactions with whole grain intake shown for 16 loci: (a) rs340874; (b) rs780094; (c) rs560887; (d) rs11708067; (e) rs11920090; (f) rs2191349; (g) rs4607517; (h) rs11558471; (i) rs7034200; (j) rs10885122; (k) rs4506565; (l) rs11605924; (m) rs7944584; (n) rs10830963; (o) rs174550; (p) rs11071657

**Figure S6.** *Interactions between daily whole grain intake and genotype for select SNPs for fasting insulin in 14 cohorts*<sup>1</sup>

<sup>1</sup>Regression coefficient for interaction between daily servings of whole grains\*SNP for fasting insulin ((ln)pmol/L), adjusted for age, sex, energy intake and field center (in Health ABC, ARIC, CHS, InCHIANTI) and population structure with principal components in FHS and Fam HS. Interactions with whole grain intake shown for 2 loci: (a) rs780094; (b) rs35767



## REFERENCES

1. Fried LP, Borhani NO, Enright P, Furberg CD, Gardin JM, Kronmal RA, Kuller LH, Manolio TA, Mittelmark MB, Newman A, et al. The Cardiovascular Health Study: design and rationale. *Ann Epidemiol*1991 Feb;1(3):263-76.
2. Feinleib M, Kannel WB, Garrison RJ, McNamara PM, Castelli WP. The Framingham Offspring Study. Design and preliminary data. *Prev Med*1975 Dec;4(4):518-25.
3. Splansky GL, Corey D, Yang Q, Atwood LD, Cupples LA, Benjamin EJ, D'Agostino RB, Sr., Fox CS, Larson MG, Murabito JM, O'Donnell CJ, Vasan RS, Wolf PA, Levy D. The Third Generation Cohort of the National Heart, Lung, and Blood Institute's Framingham Heart Study: design, recruitment, and initial examination. *Am J Epidemiol*2007 Jun 1;165(11):1328-35.
4. The Atherosclerosis Risk in Communities (ARIC) Study: design and objectives. The ARIC investigators. *Am J Epidemiol*1989 Apr;129(4):687-702.
5. Higgins M, Province M, Heiss G, Eckfeldt J, Ellison RC, Folsom AR, Rao DC, Sprafka JM, Williams R. NHLBI Family Heart Study: objectives and design. *Am J Epidemiol*1996 Jun 15;143(12):1219-28.
6. Harris TB, Launer LJ, Eiriksdottir G, Kjartansson O, Jonsson PV, Sigurdsson G, Thorgeirsson G, Aspelund T, Garcia ME, Cotch MF, Hoffman HJ, Gudnason V. Age, Gene/Environment Susceptibility-Reykjavik Study: multidisciplinary applied phenomics. *Am J Epidemiol*2007 May 1;165(9):1076-87.
7. Berglund G, Elmstahl S, Janzon L, Larsson SA. The Malmo Diet and Cancer Study. Design and feasibility. *J Intern Med*1993 Jan;233(1):45-51.
8. Ingelsson E, Sundstrom J, Arnlov J, Zethelius B, Lind L. Insulin resistance and risk of congestive heart failure. *Jama*2005 Jul 20;294(3):334-41.
9. Renstrom F, Payne F, Nordstrom A, Brito EC, Rolandsson O, Hallmans G, Barroso I, Nordstrom P, Franks PW. Replication and extension of genome-wide association study results for obesity in 4923 adults from northern Sweden. *Hum Mol Genet*2009 Apr 15;18(8):1489-96.

10. Hallmans G, Agren A, Johansson G, Johansson A, Stegmayr B, Jansson JH, Lindahl B, Rolandsson O, Soderberg S, Nilsson M, Johansson I, Weinehall L. Cardiovascular disease and diabetes in the Northern Sweden Health and Disease Study Cohort - evaluation of risk factors and their interactions. *Scand J Public Health Suppl*2003;61:18-24.
11. Hofman A, Breteler MM, van Duijn CM, Janssen HL, Krestin GP, Kuipers EJ, Stricker BH, Tiemeier H, Uitterlinden AG, Vingerling JR, Witteman JC. The Rotterdam Study: 2010 objectives and design update. *Eur J Epidemiol*2009;24(9):553-72.
12. Ferrucci L, Bandinelli S, Benvenuti E, Di Iorio A, Macchi C, Harris TB, Guralnik JM. Subsystems contributing to the decline in ability to walk: bridging the gap between epidemiology and geriatric practice in the InCHIANTI study. *J Am Geriatr Soc*2000 Dec;48(12):1618-25.
13. Papoutsakis C, Vidra NV, Hatzopoulou I, Tzirkalli M, Farmaki AE, Evagelidaki E, Kapravelou G, Kontele IG, Skenderi KP, Yannakoulia M, Dedoussis GV. The Gene-Diet Attica investigation on childhood obesity (GENDAI): overview of the study design. *Clin Chem Lab Med*2007;45(3):309-15.
14. Kanoni S, Dedoussis GV. Design and descriptive characteristics of the GHRAS: the Greek Health Randomized Aging Study. *Med Sci Monit*2008 Apr;14(4):CR204-12.
15. Houston DK, Nicklas BJ, Ding J, Harris TB, Tylavsky FA, Newman AB, Lee JS, Sahyoun NR, Visser M, Kritchevsky SB. Dietary protein intake is associated with lean mass change in older, community-dwelling adults: the Health, Aging, and Body Composition (Health ABC) Study. *Am J Clin Nutr*2008 Jan;87(1):150-5.
16. Kumanyika S, Tell GS, Fried L, Martel JK, Chinchilli VM. Picture-sort method for administering a food frequency questionnaire to older adults. *J Am Diet Assoc*1996 Feb;96(2):137-44.
17. Rimm EB, Giovannucci EL, Stampfer MJ, Colditz GA, Litin LB, Willett WC. Reproducibility and validity of an expanded self-administered semiquantitative food frequency questionnaire among male health professionals. *Am J Epidemiol*1992 May 15;135(10):1114-26; discussion 27-36.

18. Salvini S, Hunter DJ, Sampson L, Stampfer MJ, Colditz GA, Rosner B, Willett WC. Food-based validation of a dietary questionnaire: the effects of week-to-week variation in food consumption. *Int J Epidemiol* 1989 Dec;18(4):858-67.
19. Willett WC, Sampson L, Stampfer MJ, Rosner B, Bain C, Witschi J, Hennekens CH, Speizer FE. Reproducibility and validity of a semiquantitative food frequency questionnaire. *Am J Epidemiol* 1985 Jul;122(1):51-65.
20. Stevens J, Metcalf PA, Dennis BH, Grethe ST, Shimakawa T, Folsom AR. Reliability of a food frequency questionnaire by ethnicity, gender, age and education. *Nutrition Research* 1996;16(5):735-45.
21. Stein AD, Shea S, Basch CE, Contento IR, Zybert P. Consistency of the Willett semiquantitative food frequency questionnaire and 24-hour dietary recalls in estimating nutrient intakes of preschool children. *Am J Epidemiol* 1992 Mar 15;135(6):667-77.
22. Elmstahl S, Gullberg B, Riboli E, Saracci R, Lindgarde F. The Malmo Food Study: the reproducibility of a novel diet history method and an extensive food frequency questionnaire. *Eur J Clin Nutr* 1996 Mar;50(3):134-42.
23. Elmstahl S, Riboli E, Lindgarde F, Gullberg B, Saracci R. The Malmo Food Study: the relative validity of a modified diet history method and an extensive food frequency questionnaire for measuring food intake. *Eur J Clin Nutr* 1996 Mar;50(3):143-51.
24. Riboli E, Elmstahl S, Saracci R, Gullberg B, Lindgarde F. The Malmo Food Study: validity of two dietary assessment methods for measuring nutrient intake. *Int J Epidemiol* 1997;26 Suppl 1:S161-73.
25. Callmer E, Riboli E, Saracci R, Akesson B, Lindgarde F. Dietary assessment methods evaluated in the Malmo food study. *J Intern Med* 1993 Jan;233(1):53-7.
26. Johansson I, Hallmans G, Wikman A, Biessy C, Riboli E, Kaaks R. Validation and calibration of food-frequency questionnaire measurements in the Northern Sweden Health and Disease cohort. *Public Health Nutr* 2002 Jun;5(3):487-96.

27. Johansson G, Wikman A, Ahren AM, Hallmans G, Johansson I. Underreporting of energy intake in repeated 24-hour recalls related to gender, age, weight status, day of interview, educational level, reported food intake, smoking habits and area of living. *Public Health Nutr*2001 Aug;4(4):919-27.
28. Wennberg M, Vessby B, Johansson I. Evaluation of relative intake of fatty acids according to the Northern Sweden FFQ with fatty acid levels in erythrocyte membranes as biomarkers. *Public Health Nutr*2009 Sep;12(9):1477-84.
29. Klipstein-Grobusch K, den Breeijen JH, Goldbohm RA, Geleijnse JM, Hofman A, Grobbee DE, Witteman JC. Dietary assessment in the elderly: validation of a semiquantitative food frequency questionnaire. *Eur J Clin Nutr*1998 Aug;52(8):588-96.
30. Bartali B, Turrini A, Salvini S, Lauretani F, Russo CR, Corsi AM, Bandinelli S, D'Amicis A, Palli D, Guralnik JM, Ferrucci L. Dietary intake estimated using different methods in two Italian older populations. *Arch Gerontol Geriatr*2004 Jan-Feb;38(1):51-60.
31. Pisani P, Faggiano F, Krogh V, Palli D, Vineis P, Berrino F. Relative validity and reproducibility of a food frequency dietary questionnaire for use in the Italian EPIC centres. *Int J Epidemiol*1997;26 Suppl 1:S152-60.
32. Dupuis J, Langenberg C, Prokopenko I, Saxena R, Soranzo N, Jackson AU, Wheeler E, Glazer NL, Bouatia-Naji N, Gloyn AL, Lindgren CM, Magi R, Morris AP, Randall J, Johnson T, Elliott P, Rybin D, Thorleifsson G, Steinthorsdottir V, Henneman P, Grallert H, Dehghan A, Hottenga JJ, Franklin CS, Navarro P, Song K, Goel A, Perry JR, Egan JM, Lajunen T, Grarup N, Sparso T, Doney A, Voight BF, Stringham HM, Li M, Kanoni S, Shrader P, Cavalcanti-Proenca C, Kumari M, Qi L, Timpson NJ, Gieger C, Zabena C, Rocheleau G, Ingelsson E, An P, O'Connell J, Luan J, Elliott A, McCarroll SA, Payne F, Roccascocca RM, Pattou F, Sethupathy P, Ardlie K, Ariyurek Y, Balkau B, Barter P, Beilby JP, Ben-Shlomo Y, Benediktsson R, Bennett AJ, Bergmann S, Bochud M, Boerwinkle E, Bonnefond A, Bonnycastle LL, Borch-Johnsen K, Bottcher Y, Brunner E, Bumpstead SJ, Charpentier G, Chen YD, Chines P, Clarke R, Coin LJ, Cooper MN, Cornelis M,

Crawford G, Crisponi L, Day IN, de Geus EJ, Delplanque J, Dina C, Erdos MR, Fedson AC, Fischer-Rosinsky A, Forouhi NG, Fox CS, Frants R, Franzosi MG, Galan P, Goodarzi MO, Graessler J, Groves CJ, Grundy S, Gwilliam R, Gyllensten U, Hadjadj S, Hallmans G, Hammond N, Han X, Hartikainen AL, Hassanali N, Hayward C, Heath SC, Hercberg S, Herder C, Hicks AA, Hillman DR, Hingorani AD, Hofman A, Hui J, Hung J, Isomaa B, Johnson PR, Jorgensen T, Jula A, Kaakinen M, Kaprio J, Kesaniemi YA, Kivimaki M, Knight B, Koskinen S, Kovacs P, Kyvik KO, Lathrop GM, Lawlor DA, Le Bacquer O, Lecoeur C, Li Y, Lyssenko V, Mahley R, Mangino M, Manning AK, Martinez-Larrad MT, McAteer JB, McCulloch LJ, McPherson R, Meisinger C, Melzer D, Meyre D, Mitchell BD, Morcken MA, Mukherjee S, Naitza S, Narisu N, Neville MJ, Oostra BA, Orru M, Pakyz R, Palmer CN, Paolisso G, Pattaro C, Pearson D, Peden JF, Pedersen NL, Perola M, Pfeiffer AF, Pichler I, Polasek O, Posthuma D, Potter SC, Pouta A, Province MA, Psaty BM, Rathmann W, Rayner NW, Rice K, Ripatti S, Rivadeneira F, Roden M, Rolandsson O, Sandbaek A, Sandhu M, Sanna S, Sayer AA, Scheet P, Scott LJ, Seedorf U, Sharp SJ, Shields B, Sigurethsson G, Sijbrands EJ, Silveira A, Simpson L, Singleton A, Smith NL, Sovio U, Swift A, Syddall H, Syvanen AC, Tanaka T, Thorand B, Tichet J, Tonjes A, Tuomi T, Uitterlinden AG, van Dijk KW, van Hoek M, Varma D, Visvikis-Siest S, Vitart V, Vogelzangs N, Waeber G, Wagner PJ, Walley A, Walters GB, Ward KL, Watkins H, Weedon MN, Wild SH, Willemsen G, Witteman JC, Yarnell JW, Zeggini E, Zelenika D, Zethelius B, Zhai G, Zhao JH, Zillikens MC, Borecki IB, Loos RJ, Meneton P, Magnusson PK, Nathan DM, Williams GH, Hattersley AT, Silander K, Salomaa V, Smith GD, Bornstein SR, Schwarz P, Spranger J, Karpe F, Shuldiner AR, Cooper C, Dedoussis GV, Serrano-Rios M, Morris AD, Lind L, Palmer LJ, Hu FB, Franks PW, Ebrahim S, Marmot M, Kao WH, Pankow JS, Sampson MJ, Kuusisto J, Laakso M, Hansen T, Pedersen O, Pramstaller PP, Wichmann HE, Illig T, Rudan I, Wright AF, Stumvoll M, Campbell H, Wilson JF, Bergman RN, Buchanan TA, Collins FS, Mohlke KL, Tuomilehto J, Valle TT, Altshuler D, Rotter JI, Siscovick DS, Penninx BW, Boomsma DI, Deloukas P, Spector TD, Frayling TM, Ferrucci L, Kong A, Thorsteinsdottir U, Stefansson K, van Duijn CM, Aulchenko YS, Cao A, Scuteri A, Schlessinger D, Uda M, Ruukonen A, Jarvelin MR, Waterworth DM, Vollenweider P,

Peltonen L, Mooser V, Abecasis GR, Wareham NJ, Sladek R, Froguel P, Watanabe RM, Meigs JB, Groop L, Boehnke M, McCarthy MI, Florez JC, Barroso I. New genetic loci implicated in fasting glucose homeostasis and their impact on type 2 diabetes risk. *Nat Genet* Jan 17.

33. Kannel WB, Sorlie P. Some health benefits of physical activity. The Framingham Study. *Arch Intern Med* 1979 Aug;139(8):857-61.

34. Schmidt MI, Watson RL, Duncan BB, Metcalf P, Brancati FL, Sharrett AR, Davis CE, Heiss G. Clustering of dyslipidemia, hyperuricemia, diabetes, and hypertension and its association with fasting insulin and central and overall obesity in a general population. Atherosclerosis Risk in Communities Study Investigators. *Metabolism* 1996 Jun;45(6):699-706.

35. Baecke JA, Burema J, Frijters JE. A short questionnaire for the measurement of habitual physical activity in epidemiological studies. *Am J Clin Nutr* 1982 Nov;36(5):936-42.

36. Ingelsson E, Arnlov J, Sundstrom J, Riserus U, Michaelsson K, Byberg L. Relative importance and conjoint effects of obesity and physical inactivity for the development of insulin resistance. *Eur J Cardiovasc Prev Rehabil* 2009 Feb;16(1):28-33.

37. McKeown NM, Meigs JB, Liu S, Wilson PW, Jacques PF. Whole-grain intake is favorably associated with metabolic risk factors for type 2 diabetes and cardiovascular disease in the Framingham Offspring Study. *Am J Clin Nutr* 2002 Aug;76(2):390-8.
